# Supplementary material for: LPA released from dying cancer cells after chemotherapy inactivates Hippo signaling and promotes pancreatic cancer cell repopulation
Source: Research Square preprint supplement (doi:10.21203/rs.3.rs-5080105/v1), 2024-10-31
Supplement: Supplementary file 1 [file 11b6747f0ff8be7f4f9d1626.xlsx]

## Sheet: Sheet1
Quality control
GSE ID	Type	Raw count	Clean count	Percentage
GSM6567157	Pancreatic cancer (PC)	7924	6747	0.8515
GSM6567159	Pancreatic cancer (PC)	6345	5482	0.8639
GSM6567160	Pancreatic cancer (PC)	6415	5450	0.8496
GSM6567165	Adjacent tissue (CO)	5624	4471	0.795
GSM6567166	Adjacent tissue (CO)	6311	5912	0.9368
GSM6567171	Adjacent tissue (CO)	6362	6146	0.966
Summary		38981	34208
