# Supplementary material for: LPA released from dying cancer cells after chemotherapy inactivates Hippo signaling and promotes pancreatic cancer cell repopulation
Source: Research Square preprint supplement (doi:10.21203/rs.3.rs-5080105/v1), 2024-10-31
Supplement: Supplementary file 2 [file 3fd87ed61b8596ea02f4d806.xlsx]

## Sheet: Sheet1
The forward and reverse chains of genes
Gene id	Forward chain	Reverse chain
YAP1	TGTCCCAGATGAACGTCACAGC	TGGTGGCTGTTTCACTGGAGCA
β-actin	CACCATTGGCAATGAGCGGTTC	AGGTCTTTGCGGATGTCCACGT
IL6	AGACAGCCACTCACCTCTTCAG	TTCTGCCAGTGCCTCTTTGCTG
IL8	GAGAGTGATTGAGAGTGGACCAC	CACAACCCTCTGCACCCAGTTT
ATX	TATGCTGCGGAAACTCGTCAGG	GACGTTGACACACCGATGCAGT
GAPDH	GTCTCCTCTGACTTCAACAGCG	ACCACCCTGTTGCTGTAGCCAA
