# Supplementary material for: LPA released from dying cancer cells after chemotherapy inactivates Hippo signaling and promotes pancreatic cancer cell repopulation
Source: Research Square preprint supplement (doi:10.21203/rs.3.rs-5080105/v1), 2024-10-31
Supplement: Supplementary file 3 [file a39b1c5574634b8708d4f159.xlsx]

## Sheet: Sheet1
Different expressed genes between high and low YAP1 epithelial cells
Gene id	p_val	avg_log2FC	pct.1	pct.2	p_val_adj	cluster
YAP1	0	-1.35713	0	1	0	Low YAP1 Epithelial_cells
CXADR	1.8606e-142	-0.475039	0.245	0.783	5.2346e-138	Low YAP1 Epithelial_cells
NDUFS2	2.16893e-139	-0.352143	0.26	0.777	6.10206e-135	Low YAP1 Epithelial_cells
ELK4	2.18001e-139	-0.353869	0.182	0.69	6.13324e-135	Low YAP1 Epithelial_cells
PAFAH1B3	2.52553e-139	-0.2895	0.139	0.601	7.10532e-135	Low YAP1 Epithelial_cells
SERINC5	9.91317e-139	-0.302865	0.169	0.673	2.78897e-134	Low YAP1 Epithelial_cells
SCCPDH	2.8916e-137	-0.37382	0.211	0.709	8.13521e-133	Low YAP1 Epithelial_cells
EPRS	3.00445e-137	-0.473079	0.285	0.796	8.45271e-133	Low YAP1 Epithelial_cells
MRPL27	4.69077e-133	-0.267561	0.22	0.733	1.3197e-128	Low YAP1 Epithelial_cells
EHF	6.17937e-133	-0.390478	0.24	0.782	1.7385e-128	Low YAP1 Epithelial_cells
IARS2	1.95285e-132	-0.381809	0.254	0.765	5.49414e-128	Low YAP1 Epithelial_cells
ABLIM1	2.12375e-132	-0.456672	0.244	0.767	5.97496e-128	Low YAP1 Epithelial_cells
PPM1G	4.81573e-132	-0.286037	0.262	0.789	1.35486e-127	Low YAP1 Epithelial_cells
ZMAT2	1.06005e-131	-0.284059	0.248	0.772	2.98233e-127	Low YAP1 Epithelial_cells
RAB14	1.70979e-131	-0.328262	0.258	0.789	4.81032e-127	Low YAP1 Epithelial_cells
PLEKHA1	2.2275e-131	-0.281245	0.208	0.712	6.26686e-127	Low YAP1 Epithelial_cells
USP1	3.4026e-131	-0.357885	0.15	0.606	9.57289e-127	Low YAP1 Epithelial_cells
SMC3	4.42168e-131	-0.490619	0.23	0.734	1.24399e-126	Low YAP1 Epithelial_cells
PSENEN	4.90132e-131	-0.264645	0.214	0.719	1.37894e-126	Low YAP1 Epithelial_cells
GIPC1	1.15562e-130	-0.301954	0.223	0.743	3.25121e-126	Low YAP1 Epithelial_cells
LRRC8A	1.41603e-130	-0.354582	0.161	0.633	3.98387e-126	Low YAP1 Epithelial_cells
SPTSSA	2.29979e-130	-0.302238	0.169	0.647	6.47024e-126	Low YAP1 Epithelial_cells
ACSL5	2.4117e-130	-0.29553	0.122	0.573	6.78506e-126	Low YAP1 Epithelial_cells
UHMK1	2.42124e-130	-0.276913	0.227	0.744	6.81192e-126	Low YAP1 Epithelial_cells
LPGAT1	3.72658e-130	-0.388123	0.268	0.795	1.04843e-125	Low YAP1 Epithelial_cells
INAVA	8.07613e-130	-0.349952	0.222	0.729	2.27214e-125	Low YAP1 Epithelial_cells
OXR1	8.12461e-130	-0.299793	0.18	0.669	2.28578e-125	Low YAP1 Epithelial_cells
TFAP2A	8.64289e-129	-0.293982	0.081	0.479	2.43159e-124	Low YAP1 Epithelial_cells
DEK	9.65013e-129	-0.638942	0.403	0.913	2.71497e-124	Low YAP1 Epithelial_cells
REEP3	1.2984e-128	-0.318265	0.214	0.714	3.65291e-124	Low YAP1 Epithelial_cells
ARPC5L	1.35452e-128	-0.257477	0.2	0.683	3.81079e-124	Low YAP1 Epithelial_cells
PDCD10	1.41113e-128	-0.272274	0.21	0.712	3.97008e-124	Low YAP1 Epithelial_cells
CDC73	5.76628e-128	-0.265283	0.194	0.676	1.62229e-123	Low YAP1 Epithelial_cells
ERBIN	6.17807e-128	-0.329656	0.229	0.735	1.73814e-123	Low YAP1 Epithelial_cells
DUSP23	1.40895e-127	-0.277913	0.204	0.708	3.96395e-123	Low YAP1 Epithelial_cells
ACBD3	1.46225e-127	-0.505748	0.282	0.783	4.1139e-123	Low YAP1 Epithelial_cells
KCTD3	2.28435e-127	-0.254885	0.181	0.662	6.42678e-123	Low YAP1 Epithelial_cells
MRPL14	2.49519e-127	-0.285502	0.253	0.768	7.01998e-123	Low YAP1 Epithelial_cells
TIPRL	2.66648e-127	-0.267181	0.167	0.627	7.50186e-123	Low YAP1 Epithelial_cells
ARID4B	3.05896e-127	-0.408609	0.304	0.82	8.60607e-123	Low YAP1 Epithelial_cells
VPS36	4.04609e-127	-0.287808	0.203	0.699	1.13833e-122	Low YAP1 Epithelial_cells
ANP32A	4.21724e-127	-0.343696	0.263	0.779	1.18648e-122	Low YAP1 Epithelial_cells
ADSS	5.9449e-127	-0.425338	0.216	0.699	1.67254e-122	Low YAP1 Epithelial_cells
C1GALT1	7.04022e-127	-0.349372	0.187	0.66	1.98069e-122	Low YAP1 Epithelial_cells
TJP2	7.12654e-127	-0.313363	0.215	0.728	2.00498e-122	Low YAP1 Epithelial_cells
APH1A	9.14284e-127	-0.30021	0.298	0.813	2.57225e-122	Low YAP1 Epithelial_cells
SLTM	2.20647e-126	-0.356059	0.288	0.822	6.20768e-122	Low YAP1 Epithelial_cells
PDZD8	1.83804e-125	-0.418109	0.223	0.706	5.17115e-121	Low YAP1 Epithelial_cells
REXO2	4.79924e-125	-0.271363	0.193	0.666	1.35022e-120	Low YAP1 Epithelial_cells
EIF2AK2	4.9147e-125	-0.333049	0.262	0.761	1.3827e-120	Low YAP1 Epithelial_cells
CCDC6	6.08799e-125	-0.320835	0.255	0.758	1.71279e-120	Low YAP1 Epithelial_cells
KNOP1	9.83157e-125	-0.281561	0.191	0.676	2.76601e-120	Low YAP1 Epithelial_cells
SLFN5	1.04988e-124	-0.267749	0.152	0.613	2.95374e-120	Low YAP1 Epithelial_cells
SUGT1	1.98682e-124	-0.299522	0.237	0.743	5.58971e-120	Low YAP1 Epithelial_cells
NR2F2	2.04634e-124	-0.355387	0.182	0.655	5.75719e-120	Low YAP1 Epithelial_cells
RANBP1	2.2419e-124	-0.269262	0.246	0.75	6.30735e-120	Low YAP1 Epithelial_cells
PARP9	4.15666e-124	-0.279464	0.166	0.63	1.16943e-119	Low YAP1 Epithelial_cells
PARP1	4.45441e-124	-0.44164	0.281	0.771	1.2532e-119	Low YAP1 Epithelial_cells
NECTIN4	4.51643e-124	-0.328263	0.149	0.606	1.27065e-119	Low YAP1 Epithelial_cells
MYO10	9.27645e-124	-0.351572	0.207	0.688	2.60984e-119	Low YAP1 Epithelial_cells
PITPNB	9.34514e-124	-0.298867	0.21	0.697	2.62916e-119	Low YAP1 Epithelial_cells
PLEKHA5	2.27564e-123	-0.319737	0.2	0.7	6.40228e-119	Low YAP1 Epithelial_cells
NCKAP1	5.81906e-123	-0.311506	0.29	0.821	1.63714e-118	Low YAP1 Epithelial_cells
HNRNPF	7.19964e-123	-0.307743	0.301	0.814	2.02555e-118	Low YAP1 Epithelial_cells
MRPS34	1.53073e-122	-0.350574	0.273	0.768	4.30655e-118	Low YAP1 Epithelial_cells
KIF13B	2.11192e-122	-0.30441	0.198	0.686	5.94168e-118	Low YAP1 Epithelial_cells
SRPK1	4.36362e-122	-0.267385	0.189	0.652	1.22766e-117	Low YAP1 Epithelial_cells
PTPN14	4.72652e-122	-0.346461	0.131	0.559	1.32976e-117	Low YAP1 Epithelial_cells
BAG3	5.09081e-122	-0.25044	0.114	0.535	1.43225e-117	Low YAP1 Epithelial_cells
LYPLA1	6.59262e-122	-0.2829	0.227	0.704	1.85477e-117	Low YAP1 Epithelial_cells
TRAF4	8.43458e-122	-0.252523	0.161	0.624	2.37298e-117	Low YAP1 Epithelial_cells
MAML2	8.94649e-122	-0.301279	0.152	0.61	2.517e-117	Low YAP1 Epithelial_cells
ATP1B3	9.59431e-122	-0.435887	0.201	0.665	2.69926e-117	Low YAP1 Epithelial_cells
URI1	1.98629e-121	-0.308014	0.25	0.741	5.58823e-117	Low YAP1 Epithelial_cells
MYOF	2.1347e-121	-0.395136	0.212	0.704	6.00575e-117	Low YAP1 Epithelial_cells
CLTA	3.34393e-121	-0.345685	0.381	0.876	9.40782e-117	Low YAP1 Epithelial_cells
SLC39A10	4.10096e-121	-0.331899	0.158	0.617	1.15376e-116	Low YAP1 Epithelial_cells
KDM5B	9.86349e-121	-0.386652	0.293	0.804	2.77499e-116	Low YAP1 Epithelial_cells
NENF	1.45338e-120	-0.411357	0.321	0.813	4.08895e-116	Low YAP1 Epithelial_cells
SLC39A4	1.74016e-120	-0.302992	0.194	0.655	4.89578e-116	Low YAP1 Epithelial_cells
BRD7	1.7867e-120	-0.283292	0.277	0.785	5.0267e-116	Low YAP1 Epithelial_cells
MRPS21	1.78877e-120	-0.371838	0.355	0.839	5.03253e-116	Low YAP1 Epithelial_cells
SMARCE1	2.00072e-120	-0.337191	0.269	0.789	5.62883e-116	Low YAP1 Epithelial_cells
NASP	3.38842e-120	-0.371766	0.227	0.72	9.53299e-116	Low YAP1 Epithelial_cells
HIST1H2AC	1.26617e-119	-0.362402	0.175	0.648	3.56225e-115	Low YAP1 Epithelial_cells
MCM3	1.5247e-119	-0.262469	0.106	0.518	4.28958e-115	Low YAP1 Epithelial_cells
ATP5MC1	2.65324e-119	-0.374554	0.291	0.766	7.46464e-115	Low YAP1 Epithelial_cells
WWP1	2.97047e-119	-0.343162	0.227	0.706	8.35713e-115	Low YAP1 Epithelial_cells
BAG1	3.78541e-119	-0.286955	0.25	0.739	1.06499e-114	Low YAP1 Epithelial_cells
WWTR1	5.00083e-119	-0.335601	0.22	0.719	1.40693e-114	Low YAP1 Epithelial_cells
SCNN1A	5.71835e-119	-0.270633	0.193	0.681	1.6088e-114	Low YAP1 Epithelial_cells
BCL2L1	9.26458e-119	-0.308244	0.248	0.76	2.6065e-114	Low YAP1 Epithelial_cells
RAB25	1.67726e-118	-0.26288	0.277	0.775	4.71881e-114	Low YAP1 Epithelial_cells
STAG2	1.74001e-118	-0.293232	0.255	0.771	4.89536e-114	Low YAP1 Epithelial_cells
MBOAT2	1.77562e-118	-0.295222	0.128	0.553	4.99552e-114	Low YAP1 Epithelial_cells
RNF7	2.27014e-118	-0.27692	0.306	0.799	6.38681e-114	Low YAP1 Epithelial_cells
AP1M2	2.61692e-118	-0.288485	0.198	0.666	7.36245e-114	Low YAP1 Epithelial_cells
IGF2BP2	3.82881e-118	-0.257574	0.162	0.632	1.0772e-113	Low YAP1 Epithelial_cells
EFNB2	4.51546e-118	-0.398435	0.165	0.621	1.27038e-113	Low YAP1 Epithelial_cells
HOXB7	7.166e-118	-0.26614	0.096	0.487	2.01608e-113	Low YAP1 Epithelial_cells
GADD45A	8.48953e-118	-0.366204	0.196	0.674	2.38844e-113	Low YAP1 Epithelial_cells
TMCO1	1.43702e-117	-0.526075	0.373	0.869	4.04292e-113	Low YAP1 Epithelial_cells
TOP1	2.0165e-117	-0.477785	0.365	0.865	5.67323e-113	Low YAP1 Epithelial_cells
HNRNPR	2.18689e-117	-0.346717	0.319	0.831	6.1526e-113	Low YAP1 Epithelial_cells
TMEM141	3.27634e-117	-0.355927	0.232	0.692	9.21764e-113	Low YAP1 Epithelial_cells
ATP2B4	4.2789e-117	-0.324683	0.226	0.705	1.20383e-112	Low YAP1 Epithelial_cells
NBR1	7.76688e-117	-0.264733	0.219	0.703	2.18513e-112	Low YAP1 Epithelial_cells
ATP2A2	8.74605e-117	-0.262981	0.249	0.736	2.46061e-112	Low YAP1 Epithelial_cells
MEIS2	9.30459e-117	-0.377936	0.215	0.702	2.61775e-112	Low YAP1 Epithelial_cells
PPL	1.19815e-116	-0.31319	0.17	0.624	3.37087e-112	Low YAP1 Epithelial_cells
ENSA	2.49856e-116	-0.287507	0.306	0.806	7.02945e-112	Low YAP1 Epithelial_cells
U2SURP	2.91254e-116	-0.438333	0.307	0.799	8.19415e-112	Low YAP1 Epithelial_cells
GPATCH4	3.50719e-116	-0.282928	0.136	0.551	9.86713e-112	Low YAP1 Epithelial_cells
NME3	7.29558e-116	-0.276308	0.273	0.778	2.05254e-111	Low YAP1 Epithelial_cells
SUPT16H	7.87326e-116	-0.263859	0.251	0.754	2.21506e-111	Low YAP1 Epithelial_cells
SLK	1.82051e-115	-0.447169	0.292	0.778	5.12183e-111	Low YAP1 Epithelial_cells
SFT2D2	2.43452e-115	-0.29039	0.204	0.671	6.84928e-111	Low YAP1 Epithelial_cells
ADGRG1	4.42564e-115	-0.297959	0.231	0.713	1.24511e-110	Low YAP1 Epithelial_cells
CFAP298	4.7066e-115	-0.264359	0.208	0.68	1.32416e-110	Low YAP1 Epithelial_cells
CD47	7.89189e-115	-0.251228	0.292	0.804	2.22031e-110	Low YAP1 Epithelial_cells
FAM204A	9.86014e-115	-0.268718	0.203	0.668	2.77405e-110	Low YAP1 Epithelial_cells
NUFIP2	1.11509e-114	-0.283003	0.291	0.811	3.13719e-110	Low YAP1 Epithelial_cells
TMOD3	2.66098e-114	-0.34643	0.295	0.801	7.48639e-110	Low YAP1 Epithelial_cells
XRCC5	2.91558e-114	-0.322274	0.393	0.9	8.20268e-110	Low YAP1 Epithelial_cells
FNBP1L	3.33293e-114	-0.250159	0.241	0.74	9.37687e-110	Low YAP1 Epithelial_cells
CEP350	3.81631e-114	-0.285605	0.255	0.745	1.07368e-109	Low YAP1 Epithelial_cells
TJP1	4.33488e-114	-0.327289	0.314	0.843	1.21958e-109	Low YAP1 Epithelial_cells
UFC1	5.65745e-114	-0.324741	0.344	0.815	1.59167e-109	Low YAP1 Epithelial_cells
PPA1	1.34925e-113	-0.540515	0.436	0.881	3.79597e-109	Low YAP1 Epithelial_cells
RHPN2	1.38956e-113	-0.284874	0.143	0.571	3.9094e-109	Low YAP1 Epithelial_cells
VCP	1.58568e-113	-0.285063	0.284	0.772	4.46114e-109	Low YAP1 Epithelial_cells
TMEM123	1.65739e-113	-0.279281	0.352	0.846	4.6629e-109	Low YAP1 Epithelial_cells
C19orf53	2.74274e-113	-0.309466	0.353	0.833	7.71643e-109	Low YAP1 Epithelial_cells
SESTD1	2.76808e-113	-0.267454	0.159	0.6	7.78772e-109	Low YAP1 Epithelial_cells
STAT1	3.56126e-113	-0.269371	0.247	0.742	1.00193e-108	Low YAP1 Epithelial_cells
THOC2	1.71928e-112	-0.265142	0.269	0.766	4.83703e-108	Low YAP1 Epithelial_cells
PARP14	4.48667e-112	-0.291906	0.257	0.756	1.26228e-107	Low YAP1 Epithelial_cells
CCT3	5.19456e-112	-0.333053	0.354	0.837	1.46144e-107	Low YAP1 Epithelial_cells
LINC01133	5.92072e-112	-0.28161	0.115	0.517	1.66574e-107	Low YAP1 Epithelial_cells
ZFP91	6.47061e-112	-0.253059	0.244	0.723	1.82044e-107	Low YAP1 Epithelial_cells
PAK2	7.71706e-112	-0.315157	0.307	0.809	2.17112e-107	Low YAP1 Epithelial_cells
TPR	8.08564e-112	-0.436726	0.35	0.855	2.27481e-107	Low YAP1 Epithelial_cells
AIDA	9.13069e-112	-0.255981	0.203	0.643	2.56883e-107	Low YAP1 Epithelial_cells
DGKH	1.24778e-111	-0.257736	0.145	0.579	3.5105e-107	Low YAP1 Epithelial_cells
SNW1	3.31783e-111	-0.260029	0.233	0.716	9.33437e-107	Low YAP1 Epithelial_cells
SNRPE	3.439e-111	-0.296599	0.339	0.82	9.67529e-107	Low YAP1 Epithelial_cells
FAM120A	4.63629e-111	-0.363298	0.337	0.812	1.30437e-106	Low YAP1 Epithelial_cells
NDUFS6	6.62399e-111	-0.350809	0.369	0.849	1.86359e-106	Low YAP1 Epithelial_cells
SF3B6	8.36219e-111	-0.264613	0.316	0.803	2.35262e-106	Low YAP1 Epithelial_cells
WASF2	1.66418e-110	-0.289111	0.344	0.848	4.68201e-106	Low YAP1 Epithelial_cells
CLINT1	1.80151e-110	-0.483076	0.343	0.832	5.06837e-106	Low YAP1 Epithelial_cells
TMEM63A	1.81943e-110	-0.294019	0.276	0.787	5.11879e-106	Low YAP1 Epithelial_cells
FOXQ1	2.39858e-110	-0.438121	0.2	0.656	6.74817e-106	Low YAP1 Epithelial_cells
PAWR	4.54894e-110	-0.26143	0.235	0.727	1.2798e-105	Low YAP1 Epithelial_cells
UBE2H	4.77905e-110	-0.388576	0.324	0.793	1.34454e-105	Low YAP1 Epithelial_cells
SEPTIN7	4.79226e-110	-0.296214	0.335	0.865	1.34825e-105	Low YAP1 Epithelial_cells
VASP	5.87428e-110	-0.398475	0.291	0.787	1.65267e-105	Low YAP1 Epithelial_cells
DSG2	7.01559e-110	-0.402281	0.379	0.865	1.97377e-105	Low YAP1 Epithelial_cells
SYF2	7.48338e-110	-0.32418	0.366	0.869	2.10537e-105	Low YAP1 Epithelial_cells
PRKDC	1.01159e-109	-0.370482	0.29	0.759	2.846e-105	Low YAP1 Epithelial_cells
IFI16	1.37116e-109	-0.385501	0.201	0.658	3.85761e-105	Low YAP1 Epithelial_cells
KRT10	1.72309e-109	-0.352361	0.326	0.795	4.84774e-105	Low YAP1 Epithelial_cells
TOR1AIP2	1.7362e-109	-0.272565	0.294	0.785	4.88463e-105	Low YAP1 Epithelial_cells
SKAP2	2.19192e-109	-0.292969	0.167	0.605	6.16675e-105	Low YAP1 Epithelial_cells
PTBP3	2.23616e-109	-0.43819	0.295	0.766	6.2912e-105	Low YAP1 Epithelial_cells
GADD45GIP1	2.4263e-109	-0.326449	0.345	0.833	6.82615e-105	Low YAP1 Epithelial_cells
RSRC2	2.77054e-109	-0.256085	0.321	0.825	7.79464e-105	Low YAP1 Epithelial_cells
XRN2	3.14837e-109	-0.374058	0.275	0.769	8.85761e-105	Low YAP1 Epithelial_cells
FERMT1	3.36364e-109	-0.391719	0.164	0.605	9.46327e-105	Low YAP1 Epithelial_cells
AP2B1	3.48019e-109	-0.25845	0.307	0.818	9.79116e-105	Low YAP1 Epithelial_cells
LAMTOR5	3.50131e-109	-0.267838	0.337	0.831	9.85058e-105	Low YAP1 Epithelial_cells
ZNF292	4.14798e-109	-0.318228	0.257	0.747	1.16699e-104	Low YAP1 Epithelial_cells
CBX3	4.40407e-109	-0.373296	0.358	0.846	1.23904e-104	Low YAP1 Epithelial_cells
RALBP1	9.36381e-109	-0.323075	0.304	0.817	2.63442e-104	Low YAP1 Epithelial_cells
SP100	1.00558e-108	-0.263125	0.282	0.773	2.82911e-104	Low YAP1 Epithelial_cells
DNAJC21	1.00912e-108	-0.314157	0.241	0.706	2.83906e-104	Low YAP1 Epithelial_cells
COPB2	1.07002e-108	-0.267693	0.275	0.745	3.01039e-104	Low YAP1 Epithelial_cells
DNAJC15	1.21983e-108	-0.373555	0.365	0.848	3.43187e-104	Low YAP1 Epithelial_cells
MRPL57	1.33255e-108	-0.294711	0.33	0.812	3.74899e-104	Low YAP1 Epithelial_cells
RRP15	2.11482e-108	-0.276544	0.149	0.556	5.94983e-104	Low YAP1 Epithelial_cells
DYNC1LI2	2.98048e-108	-0.275659	0.318	0.819	8.38529e-104	Low YAP1 Epithelial_cells
SLCO3A1	4.02996e-108	-0.283135	0.132	0.542	1.13379e-103	Low YAP1 Epithelial_cells
ZNF704	4.34516e-108	-0.301558	0.188	0.628	1.22247e-103	Low YAP1 Epithelial_cells
LAD1	7.14495e-108	-0.315493	0.298	0.793	2.01016e-103	Low YAP1 Epithelial_cells
NUCKS1	7.55825e-108	-0.688204	0.536	0.948	2.12644e-103	Low YAP1 Epithelial_cells
KIF5B	9.04966e-108	-0.348899	0.362	0.854	2.54603e-103	Low YAP1 Epithelial_cells
ASH1L	2.96893e-107	-0.31438	0.328	0.828	8.35277e-103	Low YAP1 Epithelial_cells
RSF1	3.05765e-107	-0.302297	0.294	0.794	8.6024e-103	Low YAP1 Epithelial_cells
LITAF	3.68604e-107	-0.289401	0.315	0.819	1.03703e-102	Low YAP1 Epithelial_cells
CTDSPL	4.75646e-107	-0.256917	0.174	0.621	1.33818e-102	Low YAP1 Epithelial_cells
MTPN	5.13188e-107	-0.252674	0.297	0.792	1.4438e-102	Low YAP1 Epithelial_cells
FAM3C	1.03993e-106	-0.324408	0.294	0.766	2.92573e-102	Low YAP1 Epithelial_cells
EPS8	1.33162e-106	-0.391098	0.267	0.754	3.74639e-102	Low YAP1 Epithelial_cells
UPF3A	1.57955e-106	-0.264012	0.209	0.662	4.44389e-102	Low YAP1 Epithelial_cells
ZC3H15	1.72595e-106	-0.31178	0.332	0.811	4.8558e-102	Low YAP1 Epithelial_cells
SNRPD2	2.61986e-106	-0.369414	0.443	0.896	7.37071e-102	Low YAP1 Epithelial_cells
THRAP3	5.22387e-106	-0.260567	0.317	0.812	1.46968e-101	Low YAP1 Epithelial_cells
NIPBL	5.64204e-106	-0.313543	0.285	0.771	1.58733e-101	Low YAP1 Epithelial_cells
SSB	5.94769e-106	-0.262581	0.28	0.773	1.67332e-101	Low YAP1 Epithelial_cells
RBM47	7.47198e-106	-0.273348	0.297	0.784	2.10217e-101	Low YAP1 Epithelial_cells
ARSD	1.20726e-105	-0.290475	0.275	0.749	3.39651e-101	Low YAP1 Epithelial_cells
ZNF106	1.24091e-105	-0.253339	0.24	0.713	3.49117e-101	Low YAP1 Epithelial_cells
PRPF40A	1.41461e-105	-0.29586	0.315	0.801	3.97985e-101	Low YAP1 Epithelial_cells
TMEM219	2.25303e-105	-0.255873	0.346	0.825	6.33866e-101	Low YAP1 Epithelial_cells
GALNT3	2.26865e-105	-0.280965	0.291	0.788	6.38261e-101	Low YAP1 Epithelial_cells
KCNK1	3.02103e-105	-0.353587	0.204	0.659	8.49938e-101	Low YAP1 Epithelial_cells
CBX5	4.3549e-105	-0.277799	0.25	0.727	1.22521e-100	Low YAP1 Epithelial_cells
FAIM	4.99653e-105	-0.281728	0.178	0.608	1.40572e-100	Low YAP1 Epithelial_cells
MGMT	5.61752e-105	-0.326634	0.246	0.679	1.58043e-100	Low YAP1 Epithelial_cells
FBL	1.07133e-104	-0.252639	0.286	0.741	3.01408e-100	Low YAP1 Epithelial_cells
TES	1.71611e-104	-0.31781	0.254	0.727	4.8281e-100	Low YAP1 Epithelial_cells
GSPT1	3.38363e-104	-0.282311	0.329	0.804	9.51951e-100	Low YAP1 Epithelial_cells
CAPN2	4.29044e-104	-0.337509	0.315	0.803	1.20707e-99	Low YAP1 Epithelial_cells
TBCA	7.55379e-104	-0.369421	0.414	0.893	2.12518e-99	Low YAP1 Epithelial_cells
CRIP2	9.0723e-104	-0.292266	0.177	0.603	2.5524e-99	Low YAP1 Epithelial_cells
COX20	1.78948e-103	-0.327485	0.301	0.788	5.03454e-99	Low YAP1 Epithelial_cells
EIF4G1	2.94036e-103	-0.269642	0.347	0.838	8.2724e-99	Low YAP1 Epithelial_cells
CKLF	3.42308e-103	-0.350091	0.27	0.744	9.6305e-99	Low YAP1 Epithelial_cells
DDX18	6.18046e-103	-0.253356	0.31	0.801	1.73881e-98	Low YAP1 Epithelial_cells
CDC42EP5	6.2104e-103	-0.339284	0.266	0.727	1.74723e-98	Low YAP1 Epithelial_cells
SMIM22	8.4487e-103	-0.554089	0.472	0.902	2.37696e-98	Low YAP1 Epithelial_cells
DNAJC8	1.6682e-102	-0.274994	0.27	0.738	4.6933e-98	Low YAP1 Epithelial_cells
DDX46	1.82263e-102	-0.297136	0.32	0.803	5.12778e-98	Low YAP1 Epithelial_cells
ANP32B	2.01946e-102	-0.325578	0.389	0.849	5.68155e-98	Low YAP1 Epithelial_cells
TNFSF10	3.62699e-102	-0.2536	0.212	0.663	1.02042e-97	Low YAP1 Epithelial_cells
EIF2S2	4.25983e-102	-0.415818	0.424	0.878	1.19846e-97	Low YAP1 Epithelial_cells
NDUFB1	4.92148e-102	-0.284873	0.406	0.874	1.38461e-97	Low YAP1 Epithelial_cells
TM9SF3	5.83117e-102	-0.410696	0.451	0.915	1.64054e-97	Low YAP1 Epithelial_cells
BLVRB	6.29361e-102	-0.383516	0.342	0.809	1.77064e-97	Low YAP1 Epithelial_cells
NET1	7.21124e-102	-0.387705	0.228	0.671	2.02881e-97	Low YAP1 Epithelial_cells
MRPL20	7.68608e-102	-0.260517	0.372	0.857	2.1624e-97	Low YAP1 Epithelial_cells
GSTM3	8.26856e-102	-0.369858	0.233	0.656	2.32628e-97	Low YAP1 Epithelial_cells
TRIM29	1.18992e-101	-0.295525	0.139	0.534	3.34773e-97	Low YAP1 Epithelial_cells
PPCS	2.04817e-101	-0.283854	0.286	0.743	5.76233e-97	Low YAP1 Epithelial_cells
MT-CO1	2.37577e-101	-0.773053	0.95	0.993	6.68399e-97	Low YAP1 Epithelial_cells
MPHOSPH8	3.55103e-101	-0.27532	0.323	0.813	9.99046e-97	Low YAP1 Epithelial_cells
NAPRT	3.87485e-101	-0.34622	0.136	0.522	1.09015e-96	Low YAP1 Epithelial_cells
FARP1	4.14237e-101	-0.305881	0.257	0.723	1.16542e-96	Low YAP1 Epithelial_cells
SVIL	4.37455e-101	-0.254217	0.195	0.624	1.23073e-96	Low YAP1 Epithelial_cells
IFI44L	4.88945e-101	-0.43235	0.113	0.485	1.3756e-96	Low YAP1 Epithelial_cells
SRRM1	5.334e-101	-0.310712	0.382	0.889	1.50067e-96	Low YAP1 Epithelial_cells
PRR15L	5.82626e-101	-0.288961	0.144	0.521	1.63916e-96	Low YAP1 Epithelial_cells
STAU1	7.27419e-101	-0.274336	0.359	0.827	2.04652e-96	Low YAP1 Epithelial_cells
ARHGAP5	1.24281e-100	-0.306998	0.346	0.82	3.49654e-96	Low YAP1 Epithelial_cells
ENC1	1.75734e-100	-0.493492	0.219	0.679	4.94409e-96	Low YAP1 Epithelial_cells
ZC3H13	1.79678e-100	-0.271815	0.3	0.783	5.05505e-96	Low YAP1 Epithelial_cells
CDK6	1.95992e-100	-0.324544	0.228	0.681	5.51403e-96	Low YAP1 Epithelial_cells
CTSH	2.22377e-100	-0.397045	0.322	0.812	6.25635e-96	Low YAP1 Epithelial_cells
LPP	4.12517e-100	-0.283663	0.331	0.842	1.16057e-95	Low YAP1 Epithelial_cells
ATP6V1G1	6.16909e-100	-0.324202	0.4	0.868	1.73561e-95	Low YAP1 Epithelial_cells
AKR1C3	7.26959e-100	-0.339261	0.152	0.551	2.04523e-95	Low YAP1 Epithelial_cells
PCBD1	9.52679e-100	-0.32003	0.287	0.728	2.68027e-95	Low YAP1 Epithelial_cells
ABCC3	9.84426e-100	-0.371942	0.335	0.855	2.76958e-95	Low YAP1 Epithelial_cells
CCND1	1.04427e-99	-0.784092	0.371	0.865	2.93794e-95	Low YAP1 Epithelial_cells
MTIF3	1.19369e-99	-0.256024	0.235	0.673	3.35832e-95	Low YAP1 Epithelial_cells
SCP2	1.19502e-99	-0.257418	0.412	0.869	3.36207e-95	Low YAP1 Epithelial_cells
KDELR1	2.19064e-99	-0.389705	0.431	0.88	6.16314e-95	Low YAP1 Epithelial_cells
SH3YL1	2.31973e-99	-0.500428	0.403	0.863	6.52632e-95	Low YAP1 Epithelial_cells
BMP4	3.53806e-99	-0.259723	0.084	0.426	9.95398e-95	Low YAP1 Epithelial_cells
ARPC5	5.73753e-99	-0.446565	0.416	0.887	1.6142e-94	Low YAP1 Epithelial_cells
SOX9	6.63771e-99	-0.364327	0.284	0.771	1.86745e-94	Low YAP1 Epithelial_cells
PLAAT4	7.52894e-99	-0.345905	0.152	0.552	2.11819e-94	Low YAP1 Epithelial_cells
C9orf16	8.91062e-99	-0.389443	0.345	0.804	2.50691e-94	Low YAP1 Epithelial_cells
DNAJC10	1.25872e-98	-0.276334	0.281	0.735	3.54128e-94	Low YAP1 Epithelial_cells
PPIG	1.58526e-98	-0.251255	0.347	0.833	4.45998e-94	Low YAP1 Epithelial_cells
DSC2	1.60343e-98	-0.423675	0.235	0.687	4.5111e-94	Low YAP1 Epithelial_cells
SPATS2L	3.1393e-98	-0.354653	0.377	0.883	8.83211e-94	Low YAP1 Epithelial_cells
RAB2A	3.96525e-98	-0.367749	0.405	0.845	1.11558e-93	Low YAP1 Epithelial_cells
CEACAM1	7.05583e-98	-0.28535	0.161	0.575	1.98509e-93	Low YAP1 Epithelial_cells
HNRNPM	1.04835e-97	-0.274258	0.373	0.859	2.94942e-93	Low YAP1 Epithelial_cells
SMARCA5	1.29841e-97	-0.255333	0.317	0.796	3.65294e-93	Low YAP1 Epithelial_cells
WDR83OS	1.47555e-97	-0.313755	0.403	0.873	4.1513e-93	Low YAP1 Epithelial_cells
HSPH1	1.97472e-97	-0.271952	0.275	0.753	5.55569e-93	Low YAP1 Epithelial_cells
KLF3	2.84857e-97	-0.276421	0.273	0.738	8.01415e-93	Low YAP1 Epithelial_cells
S100A13	3.49554e-97	-0.406491	0.382	0.881	9.83434e-93	Low YAP1 Epithelial_cells
HEBP2	5.47555e-97	-0.468852	0.42	0.871	1.54049e-92	Low YAP1 Epithelial_cells
TOMM20	5.57077e-97	-0.375086	0.476	0.891	1.56728e-92	Low YAP1 Epithelial_cells
DYNC1I2	6.39772e-97	-0.341157	0.377	0.861	1.79994e-92	Low YAP1 Epithelial_cells
TSTD1	6.62223e-97	-0.260875	0.37	0.829	1.8631e-92	Low YAP1 Epithelial_cells
ASS1	6.76043e-97	-0.415566	0.16	0.542	1.90198e-92	Low YAP1 Epithelial_cells
TRIP11	1.08587e-96	-0.276965	0.338	0.823	3.05498e-92	Low YAP1 Epithelial_cells
PARD6B	1.27476e-96	-0.278188	0.171	0.58	3.5864e-92	Low YAP1 Epithelial_cells
COX16	1.29624e-96	-0.259367	0.341	0.804	3.64685e-92	Low YAP1 Epithelial_cells
CCDC186	1.60399e-96	-0.279284	0.291	0.74	4.51268e-92	Low YAP1 Epithelial_cells
HNRNPD	2.18876e-96	-0.253603	0.397	0.868	6.15785e-92	Low YAP1 Epithelial_cells
CLIC3	1.20421e-95	-0.300429	0.15	0.55	3.38792e-91	Low YAP1 Epithelial_cells
AHCYL1	2.38077e-95	-0.334478	0.334	0.823	6.69805e-91	Low YAP1 Epithelial_cells
CLDN7	2.54151e-95	-0.397497	0.383	0.869	7.15027e-91	Low YAP1 Epithelial_cells
UBXN4	6.4534e-95	-0.363232	0.428	0.885	1.8156e-90	Low YAP1 Epithelial_cells
LMO4	9.30056e-95	-0.420389	0.33	0.801	2.61662e-90	Low YAP1 Epithelial_cells
ZNHIT1	1.18097e-94	-0.275926	0.375	0.845	3.32254e-90	Low YAP1 Epithelial_cells
TCEA1	2.24791e-94	-0.339413	0.396	0.851	6.32427e-90	Low YAP1 Epithelial_cells
ROMO1	2.88745e-94	-0.307317	0.408	0.87	8.12355e-90	Low YAP1 Epithelial_cells
SUB1	3.91973e-94	-0.301912	0.438	0.89	1.10278e-89	Low YAP1 Epithelial_cells
CD2AP	4.06045e-94	-0.305857	0.359	0.83	1.14237e-89	Low YAP1 Epithelial_cells
CHMP3	5.03463e-94	-0.269409	0.386	0.845	1.41644e-89	Low YAP1 Epithelial_cells
CITED4	9.56611e-94	-0.389634	0.239	0.694	2.69133e-89	Low YAP1 Epithelial_cells
SET	1.02106e-93	-0.429752	0.481	0.913	2.87264e-89	Low YAP1 Epithelial_cells
TAX1BP1	1.24307e-93	-0.399814	0.427	0.885	3.49725e-89	Low YAP1 Epithelial_cells
PRDX2	2.17814e-93	-0.256158	0.382	0.83	6.12797e-89	Low YAP1 Epithelial_cells
ANXA11	4.48832e-93	-0.266122	0.407	0.881	1.26274e-88	Low YAP1 Epithelial_cells
GCC2	4.61471e-93	-0.353061	0.386	0.878	1.2983e-88	Low YAP1 Epithelial_cells
HNRNPAB	1.17847e-92	-0.259295	0.361	0.819	3.31551e-88	Low YAP1 Epithelial_cells
BZW1	1.4993e-92	-0.256609	0.35	0.821	4.21814e-88	Low YAP1 Epithelial_cells
ITGB4	1.52237e-92	-0.263582	0.28	0.768	4.28304e-88	Low YAP1 Epithelial_cells
NFIA	1.73728e-92	-0.258816	0.333	0.802	4.88765e-88	Low YAP1 Epithelial_cells
NDUFB11	3.63768e-92	-0.268653	0.416	0.858	1.02342e-87	Low YAP1 Epithelial_cells
EIF1AX	3.77032e-92	-0.306376	0.441	0.886	1.06074e-87	Low YAP1 Epithelial_cells
MUC20	5.02695e-92	-0.269544	0.166	0.555	1.41428e-87	Low YAP1 Epithelial_cells
CSNK1A1	5.65716e-92	-0.276869	0.403	0.879	1.59159e-87	Low YAP1 Epithelial_cells
MIDN	1.26552e-91	-0.317819	0.336	0.808	3.5604e-87	Low YAP1 Epithelial_cells
PHACTR3	1.87083e-91	-0.433857	0.059	0.35	5.26338e-87	Low YAP1 Epithelial_cells
MACROD2	8.219e-91	-0.251661	0.079	0.395	2.31233e-86	Low YAP1 Epithelial_cells
MAL2	8.64185e-91	-0.510714	0.396	0.852	2.4313e-86	Low YAP1 Epithelial_cells
MGST3	8.91387e-91	-0.287191	0.422	0.888	2.50783e-86	Low YAP1 Epithelial_cells
ATP5PF	1.00785e-90	-0.264555	0.441	0.885	2.8355e-86	Low YAP1 Epithelial_cells
COX7B	1.77883e-90	-0.262881	0.433	0.888	5.00457e-86	Low YAP1 Epithelial_cells
KMT2A	2.35495e-90	-0.253541	0.332	0.801	6.62541e-86	Low YAP1 Epithelial_cells
ANO1	3.36952e-90	-0.297015	0.098	0.435	9.47981e-86	Low YAP1 Epithelial_cells
MT-CO3	5.50398e-90	-0.7285	0.964	0.996	1.54849e-85	Low YAP1 Epithelial_cells
ZBTB20	5.90342e-90	-0.348075	0.292	0.75	1.66087e-85	Low YAP1 Epithelial_cells
MT-CO2	1.65906e-89	-0.710094	0.955	0.995	4.66759e-85	Low YAP1 Epithelial_cells
HES1	2.97322e-89	-0.402966	0.326	0.798	8.36486e-85	Low YAP1 Epithelial_cells
KRT15	3.56685e-89	-0.374483	0.05	0.332	1.0035e-84	Low YAP1 Epithelial_cells
RAB3IP	1.47922e-88	-0.35847	0.195	0.597	4.16163e-84	Low YAP1 Epithelial_cells
CLDN1	1.89446e-88	-0.333846	0.279	0.733	5.32988e-84	Low YAP1 Epithelial_cells
AQP3	2.01561e-88	-0.470756	0.103	0.426	5.67071e-84	Low YAP1 Epithelial_cells
SYT8	2.14523e-88	-0.344072	0.107	0.443	6.0354e-84	Low YAP1 Epithelial_cells
CDKN2A	3.95126e-88	-0.378508	0.12	0.473	1.11165e-83	Low YAP1 Epithelial_cells
MTDH	1.38679e-86	-0.364905	0.457	0.916	3.90158e-82	Low YAP1 Epithelial_cells
WLS	3.40331e-86	-0.269392	0.242	0.664	9.57487e-82	Low YAP1 Epithelial_cells
MACC1	4.55159e-86	-0.270121	0.216	0.63	1.28054e-81	Low YAP1 Epithelial_cells
SERBP1	7.38035e-86	-0.434847	0.53	0.931	2.07639e-81	Low YAP1 Epithelial_cells
PLAAT3	8.04176e-86	-0.393418	0.299	0.714	2.26247e-81	Low YAP1 Epithelial_cells
TXN	8.82003e-86	-0.50468	0.523	0.914	2.48143e-81	Low YAP1 Epithelial_cells
CAST	8.87498e-86	-0.528836	0.503	0.944	2.49689e-81	Low YAP1 Epithelial_cells
ITGA2	8.90343e-86	-0.40733	0.291	0.749	2.50489e-81	Low YAP1 Epithelial_cells
IQGAP1	9.0206e-86	-0.290743	0.425	0.897	2.53785e-81	Low YAP1 Epithelial_cells
CD46	1.04751e-85	-0.337051	0.454	0.912	2.94707e-81	Low YAP1 Epithelial_cells
PBX1	1.75018e-85	-0.260127	0.284	0.722	4.92397e-81	Low YAP1 Epithelial_cells
POMP	2.05711e-85	-0.258744	0.424	0.857	5.78747e-81	Low YAP1 Epithelial_cells
ID1	2.30819e-85	-0.431648	0.26	0.696	6.49387e-81	Low YAP1 Epithelial_cells
UQCRH	3.20974e-85	-0.352338	0.503	0.92	9.03027e-81	Low YAP1 Epithelial_cells
EID1	3.57576e-85	-0.261049	0.407	0.878	1.006e-80	Low YAP1 Epithelial_cells
MUC13	8.49976e-85	-0.250212	0.149	0.521	2.39132e-80	Low YAP1 Epithelial_cells
PPP1R14B	9.83866e-85	-0.330831	0.453	0.864	2.76801e-80	Low YAP1 Epithelial_cells
ACTN1	1.7496e-84	-0.304266	0.357	0.814	4.92233e-80	Low YAP1 Epithelial_cells
AKAP9	5.9466e-84	-0.261499	0.426	0.913	1.67302e-79	Low YAP1 Epithelial_cells
PRRC2C	7.5878e-84	-0.414887	0.518	0.937	2.13475e-79	Low YAP1 Epithelial_cells
ADGRF1	2.21528e-83	-0.314483	0.074	0.363	6.23248e-79	Low YAP1 Epithelial_cells
NDUFB2	4.49357e-83	-0.25166	0.448	0.896	1.26422e-78	Low YAP1 Epithelial_cells
UQCR11	7.10467e-83	-0.330232	0.499	0.913	1.99883e-78	Low YAP1 Epithelial_cells
FLNB	9.11172e-83	-0.281912	0.37	0.858	2.56349e-78	Low YAP1 Epithelial_cells
SYNE2	1.09728e-82	-0.499328	0.472	0.929	3.08709e-78	Low YAP1 Epithelial_cells
SKIL	1.48015e-82	-0.26065	0.291	0.731	4.16425e-78	Low YAP1 Epithelial_cells
TNS4	2.25121e-82	-0.339035	0.09	0.402	6.33356e-78	Low YAP1 Epithelial_cells
KRT23	2.79149e-82	-0.285967	0.103	0.429	7.85358e-78	Low YAP1 Epithelial_cells
TTC3	3.09544e-82	-0.267218	0.396	0.841	8.70871e-78	Low YAP1 Epithelial_cells
COX7A2	3.10793e-82	-0.358359	0.483	0.9	8.74384e-78	Low YAP1 Epithelial_cells
SORBS2	5.70793e-82	-0.544199	0.243	0.649	1.60587e-77	Low YAP1 Epithelial_cells
KCNQ1OT1	7.79194e-82	-0.335949	0.307	0.744	2.19218e-77	Low YAP1 Epithelial_cells
MARCKSL1	1.9674e-81	-0.371108	0.328	0.779	5.53507e-77	Low YAP1 Epithelial_cells
RIOK3	3.18535e-81	-0.279742	0.369	0.829	8.96167e-77	Low YAP1 Epithelial_cells
IFIT3	8.22912e-81	-0.254249	0.09	0.395	2.31518e-76	Low YAP1 Epithelial_cells
GTF2I	9.20646e-81	-0.396174	0.5	0.936	2.59014e-76	Low YAP1 Epithelial_cells
TPM3	2.14619e-80	-0.498555	0.547	0.928	6.03808e-76	Low YAP1 Epithelial_cells
SEC62	4.58619e-80	-0.347992	0.478	0.916	1.29028e-75	Low YAP1 Epithelial_cells
PSMA7	7.03751e-80	-0.339103	0.491	0.893	1.97993e-75	Low YAP1 Epithelial_cells
MALL	9.08279e-80	-0.259191	0.217	0.614	2.55535e-75	Low YAP1 Epithelial_cells
AHNAK2	1.06433e-79	-0.25812	0.243	0.668	2.99438e-75	Low YAP1 Epithelial_cells
MUC4	1.22773e-79	-0.415373	0.059	0.325	3.45408e-75	Low YAP1 Epithelial_cells
HIST1H1C	1.72649e-79	-0.288164	0.293	0.709	4.85729e-75	Low YAP1 Epithelial_cells
AQP5	2.60792e-79	-0.378533	0.135	0.476	7.33711e-75	Low YAP1 Epithelial_cells
TOB1	3.78259e-79	-0.418062	0.433	0.842	1.06419e-74	Low YAP1 Epithelial_cells
N4BP2L2	4.82958e-79	-0.261259	0.397	0.872	1.35876e-74	Low YAP1 Epithelial_cells
HNRNPK	7.72818e-79	-0.307723	0.507	0.928	2.17425e-74	Low YAP1 Epithelial_cells
EIF3A	9.72347e-79	-0.312533	0.481	0.887	2.7356e-74	Low YAP1 Epithelial_cells
ITGA6	2.54795e-78	-0.404012	0.372	0.796	7.1684e-74	Low YAP1 Epithelial_cells
RBM39	3.31861e-78	-0.309493	0.459	0.922	9.33658e-74	Low YAP1 Epithelial_cells
ARPC1B	3.70523e-78	-0.252776	0.407	0.86	1.04243e-73	Low YAP1 Epithelial_cells
GOLGB1	1.4446e-77	-0.352414	0.482	0.915	4.06423e-73	Low YAP1 Epithelial_cells
UQCRQ	5.01529e-77	-0.328564	0.523	0.924	1.411e-72	Low YAP1 Epithelial_cells
CAMK2N1	5.6572e-77	-0.6049	0.339	0.755	1.5916e-72	Low YAP1 Epithelial_cells
NSA2	1.14985e-76	-0.251922	0.374	0.813	3.23498e-72	Low YAP1 Epithelial_cells
LAMA3	2.18797e-76	-0.252547	0.259	0.694	6.15562e-72	Low YAP1 Epithelial_cells
TSPAN1	5.32009e-76	-0.282424	0.252	0.675	1.49675e-71	Low YAP1 Epithelial_cells
PTTG1IP	1.45862e-75	-0.294554	0.445	0.894	4.10367e-71	Low YAP1 Epithelial_cells
TXNIP	3.30982e-75	-0.869506	0.555	0.924	9.31184e-71	Low YAP1 Epithelial_cells
GLUL	4.52797e-75	-0.300357	0.404	0.829	1.2739e-70	Low YAP1 Epithelial_cells
APP	8.43806e-75	-0.390281	0.453	0.897	2.37396e-70	Low YAP1 Epithelial_cells
CDC42	9.68939e-75	-0.274167	0.481	0.907	2.72601e-70	Low YAP1 Epithelial_cells
GUK1	1.67624e-74	-0.398935	0.543	0.918	4.71593e-70	Low YAP1 Epithelial_cells
COL17A1	1.49891e-73	-0.446642	0.132	0.454	4.21703e-69	Low YAP1 Epithelial_cells
MT-CYB	1.94353e-73	-0.627813	0.946	0.996	5.46793e-69	Low YAP1 Epithelial_cells
LMO7	2.02906e-73	-0.361321	0.396	0.872	5.70857e-69	Low YAP1 Epithelial_cells
ALDH3A2	3.23202e-73	-0.259454	0.175	0.525	9.09296e-69	Low YAP1 Epithelial_cells
APLP2	1.29512e-72	-0.412815	0.498	0.942	3.64369e-68	Low YAP1 Epithelial_cells
KLK10	9.67048e-72	-0.351634	0.157	0.503	2.72069e-67	Low YAP1 Epithelial_cells
MMP7	1.32242e-71	-0.925328	0.491	0.894	3.72051e-67	Low YAP1 Epithelial_cells
TGM2	2.35041e-71	-0.324196	0.2	0.572	6.61264e-67	Low YAP1 Epithelial_cells
EIF3E	3.17452e-71	-0.269345	0.491	0.883	8.93121e-67	Low YAP1 Epithelial_cells
HINT1	4.39615e-71	-0.389275	0.579	0.942	1.23681e-66	Low YAP1 Epithelial_cells
S100A16	5.1963e-71	-0.392894	0.4	0.845	1.46193e-66	Low YAP1 Epithelial_cells
ARL6IP1	1.38236e-69	-0.266864	0.454	0.909	3.88912e-65	Low YAP1 Epithelial_cells
LINC00342	1.84703e-69	-0.362904	0.182	0.531	5.19643e-65	Low YAP1 Epithelial_cells
ELOB	2.16215e-69	-0.366706	0.58	0.935	6.08299e-65	Low YAP1 Epithelial_cells
PERP	2.46194e-69	-0.447705	0.497	0.918	6.92642e-65	Low YAP1 Epithelial_cells
PLAT	6.47321e-69	-0.437635	0.215	0.582	1.82117e-64	Low YAP1 Epithelial_cells
OST4	8.27176e-68	-0.250033	0.524	0.914	2.32718e-63	Low YAP1 Epithelial_cells
DSP	8.43917e-68	-0.511268	0.55	0.937	2.37428e-63	Low YAP1 Epithelial_cells
YBX1	1.08804e-67	-0.349785	0.601	0.947	3.0611e-63	Low YAP1 Epithelial_cells
S100A2	1.53531e-67	-0.310764	0.122	0.429	4.31944e-63	Low YAP1 Epithelial_cells
ARPC2	1.92864e-67	-0.258429	0.505	0.912	5.42605e-63	Low YAP1 Epithelial_cells
EPCAM	2.27954e-67	-0.472031	0.586	0.96	6.41326e-63	Low YAP1 Epithelial_cells
NDUFA13	2.33199e-67	-0.312064	0.552	0.939	6.56081e-63	Low YAP1 Epithelial_cells
MUC16	3.7139e-67	-0.283705	0.09	0.36	1.04487e-62	Low YAP1 Epithelial_cells
ITGB6	3.73037e-67	-0.287638	0.312	0.735	1.0495e-62	Low YAP1 Epithelial_cells
HNRNPU	6.47227e-67	-0.290194	0.52	0.938	1.82091e-62	Low YAP1 Epithelial_cells
SPINT2	1.0497e-66	-0.451143	0.616	0.96	2.95322e-62	Low YAP1 Epithelial_cells
MT-ATP6	2.84404e-66	-0.550866	0.981	0.997	8.00142e-62	Low YAP1 Epithelial_cells
ATP1A1	3.85863e-66	-0.571694	0.575	0.96	1.08559e-61	Low YAP1 Epithelial_cells
COX6B1	4.73404e-66	-0.29202	0.568	0.927	1.33187e-61	Low YAP1 Epithelial_cells
ATP5MC2	4.81137e-66	-0.278605	0.549	0.924	1.35363e-61	Low YAP1 Epithelial_cells
PSCA	9.72054e-66	-0.59459	0.094	0.361	2.73478e-61	Low YAP1 Epithelial_cells
SON	1.0379e-65	-0.285664	0.485	0.933	2.92002e-61	Low YAP1 Epithelial_cells
BTF3	1.88468e-64	-0.307276	0.565	0.922	5.30237e-60	Low YAP1 Epithelial_cells
SPTBN1	2.01381e-64	-0.339088	0.481	0.929	5.66564e-60	Low YAP1 Epithelial_cells
TESC	5.75868e-64	-0.272857	0.355	0.735	1.62015e-59	Low YAP1 Epithelial_cells
GLIS3	1.62024e-63	-0.3143	0.118	0.404	4.55839e-59	Low YAP1 Epithelial_cells
HMGB1	2.82851e-63	-0.446782	0.649	0.968	7.95773e-59	Low YAP1 Epithelial_cells
CHCHD2	4.02227e-63	-0.254423	0.574	0.94	1.13163e-58	Low YAP1 Epithelial_cells
SLC12A2	1.34052e-62	-0.345199	0.315	0.712	3.77141e-58	Low YAP1 Epithelial_cells
CLDN10	7.87495e-62	-0.523872	0.372	0.726	2.21554e-57	Low YAP1 Epithelial_cells
COX4I1	1.52667e-61	-0.370037	0.604	0.932	4.29512e-57	Low YAP1 Epithelial_cells
EDN1	2.66883e-61	-0.362461	0.175	0.492	7.50848e-57	Low YAP1 Epithelial_cells
NCL	9.22642e-61	-0.26115	0.552	0.94	2.59576e-56	Low YAP1 Epithelial_cells
HSPG2	1.01686e-60	0.252494	0.266	0.696	2.86084e-56	Low YAP1 Epithelial_cells
MT-ND3	1.05573e-60	-0.528246	0.962	0.993	2.9702e-56	Low YAP1 Epithelial_cells
DST	2.58731e-60	-0.296279	0.467	0.917	7.27913e-56	Low YAP1 Epithelial_cells
MYL12B	3.52226e-60	-0.330806	0.549	0.95	9.90952e-56	Low YAP1 Epithelial_cells
PTMA	2.23472e-59	-0.558309	0.904	0.995	6.28717e-55	Low YAP1 Epithelial_cells
PPP1R1B	3.99266e-59	-0.361172	0.159	0.457	1.1233e-54	Low YAP1 Epithelial_cells
CALM2	4.83205e-59	-0.380132	0.595	0.96	1.35945e-54	Low YAP1 Epithelial_cells
MYL12A	1.43774e-58	-0.280482	0.528	0.94	4.04493e-54	Low YAP1 Epithelial_cells
ITGB1	2.27664e-58	-0.351299	0.565	0.942	6.40511e-54	Low YAP1 Epithelial_cells
ADH1C	3.81632e-58	-0.318871	0.052	0.259	1.07368e-53	Low YAP1 Epithelial_cells
SERPINB1	1.59657e-57	-0.315166	0.471	0.836	4.4918e-53	Low YAP1 Epithelial_cells
GMNN	1.8199e-57	-0.461658	0.201	0.517	5.1201e-53	Low YAP1 Epithelial_cells
NME2	1.37458e-56	-0.457614	0.69	0.947	3.86726e-52	Low YAP1 Epithelial_cells
AKR1C1	2.04566e-56	-0.562274	0.1	0.341	5.75525e-52	Low YAP1 Epithelial_cells
ELF3	2.53828e-56	-0.347743	0.539	0.919	7.14119e-52	Low YAP1 Epithelial_cells
KRT16	2.67582e-56	-0.255884	0.186	0.504	7.52814e-52	Low YAP1 Epithelial_cells
KLK7	3.18384e-56	-0.278981	0.192	0.514	8.95743e-52	Low YAP1 Epithelial_cells
FSTL1	8.03045e-56	0.29515	0.138	0.437	2.25929e-51	Low YAP1 Epithelial_cells
PTGS2	1.47164e-55	-0.272742	0.141	0.424	4.14031e-51	Low YAP1 Epithelial_cells
CEACAM7	2.97514e-55	-0.408246	0.056	0.262	8.37026e-51	Low YAP1 Epithelial_cells
RPS20	5.81958e-55	-0.413624	0.694	0.966	1.63728e-50	Low YAP1 Epithelial_cells
GDF15	4.13663e-54	-0.565515	0.118	0.368	1.1638e-49	Low YAP1 Epithelial_cells
DSTN	1.11443e-53	-0.390997	0.582	0.93	3.13534e-49	Low YAP1 Epithelial_cells
TPM4	1.37017e-53	-0.270832	0.497	0.923	3.85484e-49	Low YAP1 Epithelial_cells
HSPA5	2.88597e-53	-0.256554	0.532	0.899	8.11939e-49	Low YAP1 Epithelial_cells
DMBT1	1.60655e-52	-0.519749	0.077	0.295	4.51985e-48	Low YAP1 Epithelial_cells
C19orf33	2.58326e-52	-0.513148	0.417	0.766	7.26774e-48	Low YAP1 Epithelial_cells
PMEPA1	3.36255e-52	-0.517713	0.549	0.926	9.46019e-48	Low YAP1 Epithelial_cells
IFITM3	9.39496e-52	-0.283708	0.528	0.922	2.64318e-47	Low YAP1 Epithelial_cells
WFDC2	1.03162e-51	-0.279448	0.428	0.842	2.90235e-47	Low YAP1 Epithelial_cells
CRABP2	1.85768e-51	-0.384214	0.147	0.417	5.22641e-47	Low YAP1 Epithelial_cells
SLC16A7	2.13758e-51	-0.252493	0.148	0.415	6.01388e-47	Low YAP1 Epithelial_cells
LY6E	4.61003e-51	-0.318167	0.47	0.86	1.29699e-46	Low YAP1 Epithelial_cells
ANXA4	1.01951e-49	-0.462098	0.553	0.948	2.86828e-45	Low YAP1 Epithelial_cells
SERPINA5	3.19292e-49	-0.304094	0.169	0.45	8.98296e-45	Low YAP1 Epithelial_cells
TPM1	1.72418e-48	-0.415326	0.562	0.95	4.8508e-44	Low YAP1 Epithelial_cells
CD68	3.01951e-48	0.321183	0.163	0.467	8.4951e-44	Low YAP1 Epithelial_cells
S100A10	3.55916e-48	-0.528092	0.72	0.979	1.00133e-43	Low YAP1 Epithelial_cells
AQP1	4.04962e-48	-0.337971	0.18	0.466	1.13932e-43	Low YAP1 Epithelial_cells
ACTN4	7.5697e-48	-0.258263	0.556	0.939	2.12966e-43	Low YAP1 Epithelial_cells
MIA	1.34756e-47	-0.371482	0.231	0.541	3.79123e-43	Low YAP1 Epithelial_cells
MT-ND4	2.39479e-47	-0.46574	0.945	0.997	6.73751e-43	Low YAP1 Epithelial_cells
COX7C	2.94418e-47	-0.322641	0.63	0.957	8.28316e-43	Low YAP1 Epithelial_cells
DDIT4	4.30735e-47	-0.273495	0.349	0.689	1.21183e-42	Low YAP1 Epithelial_cells
SCD5	5.01373e-47	-0.252813	0.108	0.336	1.41056e-42	Low YAP1 Epithelial_cells
YWHAZ	5.88615e-47	-0.290538	0.595	0.942	1.65601e-42	Low YAP1 Epithelial_cells
LGALS3	8.00986e-47	-0.496971	0.549	0.868	2.25349e-42	Low YAP1 Epithelial_cells
PPIA	1.81925e-46	-0.278985	0.717	0.972	5.11828e-42	Low YAP1 Epithelial_cells
SRP14	2.36544e-46	-0.25658	0.626	0.965	6.65494e-42	Low YAP1 Epithelial_cells
MT-ND2	7.81136e-46	-0.388576	0.919	0.991	2.19765e-41	Low YAP1 Epithelial_cells
IL1RN	2.36335e-45	0.262263	0.168	0.46	6.64906e-41	Low YAP1 Epithelial_cells
GSTP1	4.58097e-45	-0.343217	0.71	0.968	1.28881e-40	Low YAP1 Epithelial_cells
MT-ND1	1.45896e-43	-0.425874	0.924	0.995	4.10463e-39	Low YAP1 Epithelial_cells
TAGLN2	1.61477e-43	-0.263177	0.572	0.926	4.54298e-39	Low YAP1 Epithelial_cells
GPRC5A	1.11194e-42	-0.293655	0.372	0.732	3.12833e-38	Low YAP1 Epithelial_cells
DCDC2	3.29617e-42	-0.504918	0.148	0.384	9.27343e-38	Low YAP1 Epithelial_cells
KRT19	7.68081e-41	-0.517145	0.652	0.924	2.16092e-36	Low YAP1 Epithelial_cells
S100P	1.72025e-40	-0.361823	0.348	0.688	4.83974e-36	Low YAP1 Epithelial_cells
SAA1	2.99832e-40	-0.31716	0.1	0.307	8.43546e-36	Low YAP1 Epithelial_cells
HSP90AB1	3.94902e-40	-0.351975	0.718	0.973	1.11102e-35	Low YAP1 Epithelial_cells
H3F3A	6.87509e-40	-0.363115	0.819	0.99	1.93424e-35	Low YAP1 Epithelial_cells
IGFBP4	3.98382e-39	0.493998	0.249	0.589	1.12081e-34	Low YAP1 Epithelial_cells
ATF3	1.1605e-38	-0.395158	0.299	0.587	3.26495e-34	Low YAP1 Epithelial_cells
TM4SF1	1.48483e-38	-0.279171	0.548	0.933	4.17742e-34	Low YAP1 Epithelial_cells
SOD3	1.53039e-38	-0.274223	0.18	0.43	4.3056e-34	Low YAP1 Epithelial_cells
GADD45B	1.66575e-38	0.251146	0.266	0.576	4.68642e-34	Low YAP1 Epithelial_cells
ATP1B1	2.93007e-38	-0.370213	0.574	0.951	8.24346e-34	Low YAP1 Epithelial_cells
IFI30	3.00904e-38	0.388983	0.205	0.493	8.46564e-34	Low YAP1 Epithelial_cells
C1R	1.13338e-37	0.268427	0.138	0.372	3.18865e-33	Low YAP1 Epithelial_cells
RPS8	1.66343e-37	-0.35773	0.815	0.982	4.67989e-33	Low YAP1 Epithelial_cells
PROX1	1.97336e-37	-0.319229	0.123	0.327	5.55184e-33	Low YAP1 Epithelial_cells
RPS19	2.92954e-37	-0.378516	0.923	0.996	8.24197e-33	Low YAP1 Epithelial_cells
HSP90B1	1.32546e-36	-0.255043	0.613	0.943	3.72905e-32	Low YAP1 Epithelial_cells
FXYD3	1.41138e-36	-0.466956	0.497	0.769	3.97078e-32	Low YAP1 Epithelial_cells
CD55	4.63577e-36	-0.3674	0.453	0.811	1.30423e-31	Low YAP1 Epithelial_cells
FILIP1L	1.31576e-35	-0.273966	0.165	0.396	3.70175e-31	Low YAP1 Epithelial_cells
HLA-DPB1	1.84356e-35	0.266334	0.291	0.615	5.18667e-31	Low YAP1 Epithelial_cells
ATP5F1E	2.16438e-35	-0.277554	0.763	0.981	6.08928e-31	Low YAP1 Epithelial_cells
IGFBP3	2.88863e-35	0.264885	0.159	0.403	8.12687e-31	Low YAP1 Epithelial_cells
HNRNPH1	3.43632e-35	0.263663	0.473	0.886	9.66774e-31	Low YAP1 Epithelial_cells
CEACAM5	4.23076e-35	-0.651297	0.107	0.295	1.19028e-30	Low YAP1 Epithelial_cells
LCN2	5.88757e-35	-0.428482	0.404	0.734	1.65641e-30	Low YAP1 Epithelial_cells
CTSB	9.21323e-35	0.261491	0.469	0.847	2.59205e-30	Low YAP1 Epithelial_cells
SLC4A4	1.06136e-34	-0.740333	0.235	0.48	2.98602e-30	Low YAP1 Epithelial_cells
HSP90AA1	2.12565e-34	-0.38833	0.762	0.979	5.98031e-30	Low YAP1 Epithelial_cells
CFTR	2.90583e-34	-0.728002	0.24	0.477	8.17527e-30	Low YAP1 Epithelial_cells
HLA-DQB1	3.09097e-34	0.294605	0.209	0.488	8.69613e-30	Low YAP1 Epithelial_cells
ITM2B	4.79636e-34	-0.284003	0.73	0.97	1.34941e-29	Low YAP1 Epithelial_cells
CXCL17	1.15184e-33	-0.461169	0.272	0.515	3.24058e-29	Low YAP1 Epithelial_cells
MYL9	1.22443e-33	0.396046	0.15	0.385	3.44481e-29	Low YAP1 Epithelial_cells
CALD1	2.05506e-33	0.253062	0.274	0.581	5.78171e-29	Low YAP1 Epithelial_cells
S100A11	2.79698e-33	-0.371786	0.779	0.977	7.86903e-29	Low YAP1 Epithelial_cells
RPS16	3.75526e-33	-0.31081	0.84	0.985	1.05651e-28	Low YAP1 Epithelial_cells
PLIN2	7.04962e-33	0.288728	0.135	0.349	1.98334e-28	Low YAP1 Epithelial_cells
APOL1	7.89397e-33	0.307139	0.305	0.652	2.22089e-28	Low YAP1 Epithelial_cells
RPL7	1.13344e-32	-0.264694	0.741	0.973	3.18882e-28	Low YAP1 Epithelial_cells
PKHD1	6.06881e-32	-0.289667	0.097	0.269	1.7074e-27	Low YAP1 Epithelial_cells
S100A6	6.75797e-30	-0.511436	0.795	0.977	1.90129e-25	Low YAP1 Epithelial_cells
AL627171.2	2.36088e-29	0.390748	0.32	0.624	6.6421e-25	Low YAP1 Epithelial_cells
ID3	3.26431e-29	0.288774	0.133	0.331	9.18382e-25	Low YAP1 Epithelial_cells
HEG1	2.14117e-28	-0.25943	0.122	0.297	6.02395e-24	Low YAP1 Epithelial_cells
C1S	2.5125e-28	0.368816	0.139	0.344	7.06868e-24	Low YAP1 Epithelial_cells
COL12A1	2.5939e-28	0.400371	0.116	0.305	7.29769e-24	Low YAP1 Epithelial_cells
TCN1	2.77787e-27	-0.430312	0.12	0.292	7.81525e-23	Low YAP1 Epithelial_cells
MUC6	3.82104e-27	-0.401619	0.173	0.363	1.07501e-22	Low YAP1 Epithelial_cells
SGK1	1.76782e-26	0.334865	0.277	0.549	4.97359e-22	Low YAP1 Epithelial_cells
C1orf56	1.77012e-26	0.292689	0.111	0.285	4.98007e-22	Low YAP1 Epithelial_cells
SLC3A1	3.47126e-26	-0.384829	0.185	0.379	9.76605e-22	Low YAP1 Epithelial_cells
KRT17	1.55686e-25	-0.463376	0.411	0.687	4.38008e-21	Low YAP1 Epithelial_cells
S100A9	3.96368e-24	-0.285932	0.191	0.396	1.11514e-19	Low YAP1 Epithelial_cells
GAPDH	5.16124e-24	-0.2874	0.776	0.979	1.45206e-19	Low YAP1 Epithelial_cells
MTRNR2L12	6.81184e-24	0.871893	0.242	0.481	1.91644e-19	Low YAP1 Epithelial_cells
LY6D	1.15692e-23	-0.279217	0.136	0.309	3.25489e-19	Low YAP1 Epithelial_cells
CELA2A	5.26825e-23	2.94904	0.26	0.123	1.48217e-18	Low YAP1 Epithelial_cells
CPA2	1.0745e-22	2.51609	0.261	0.126	3.02299e-18	Low YAP1 Epithelial_cells
RBP1	3.64119e-22	-0.255842	0.35	0.575	1.02441e-17	Low YAP1 Epithelial_cells
FXYD2	3.0108e-21	-0.581786	0.169	0.331	8.47059e-17	Low YAP1 Epithelial_cells
DEFB1	5.27645e-21	-0.355346	0.265	0.459	1.48448e-16	Low YAP1 Epithelial_cells
TUBA1A	1.93185e-20	0.278556	0.229	0.449	5.43506e-16	Low YAP1 Epithelial_cells
CTRB2	5.14847e-20	2.2863	0.279	0.155	1.44847e-15	Low YAP1 Epithelial_cells
PABPC4	5.61939e-20	0.25851	0.422	0.765	1.58096e-15	Low YAP1 Epithelial_cells
CELA3A	7.4809e-20	3.07183	0.302	0.179	2.10468e-15	Low YAP1 Epithelial_cells
BTG2	7.88408e-20	0.371494	0.335	0.597	2.21811e-15	Low YAP1 Epithelial_cells
ONECUT1	9.41707e-20	-0.265234	0.176	0.331	2.6494e-15	Low YAP1 Epithelial_cells
ITGB2	1.10595e-19	0.323185	0.13	0.292	3.11149e-15	Low YAP1 Epithelial_cells
PNLIP	6.67832e-19	3.15349	0.309	0.191	1.87888e-14	Low YAP1 Epithelial_cells
CPB1	1.00618e-18	3.13182	0.296	0.18	2.83078e-14	Low YAP1 Epithelial_cells
NR4A2	1.93466e-18	0.352751	0.199	0.394	5.44296e-14	Low YAP1 Epithelial_cells
IFI27	2.46852e-18	-0.27914	0.598	0.791	6.94494e-14	Low YAP1 Epithelial_cells
CPA1	2.72361e-18	3.10637	0.301	0.186	7.6626e-14	Low YAP1 Epithelial_cells
AMY2A	2.96756e-18	3.3667	0.273	0.159	8.34893e-14	Low YAP1 Epithelial_cells
CEL	3.45094e-18	2.84028	0.285	0.171	9.70887e-14	Low YAP1 Epithelial_cells
PLXDC2	4.27253e-18	0.307661	0.113	0.256	1.20203e-13	Low YAP1 Epithelial_cells
COL6A1	9.68407e-18	0.452144	0.323	0.575	2.72452e-13	Low YAP1 Epithelial_cells
SYCN	9.97908e-18	2.99889	0.291	0.178	2.80752e-13	Low YAP1 Epithelial_cells
PLA2G1B	1.34675e-17	2.76741	0.289	0.176	3.78896e-13	Low YAP1 Epithelial_cells
CEACAM6	1.48348e-17	-0.281289	0.45	0.697	4.17362e-13	Low YAP1 Epithelial_cells
CTRB1	4.64818e-17	3.03316	0.307	0.198	1.30772e-12	Low YAP1 Epithelial_cells
CLPS	5.35554e-17	2.96719	0.315	0.204	1.50673e-12	Low YAP1 Epithelial_cells
ICAM1	1.07605e-16	0.282387	0.115	0.253	3.02735e-12	Low YAP1 Epithelial_cells
MKNK1	1.47878e-16	0.314206	0.169	0.332	4.16041e-12	Low YAP1 Epithelial_cells
PSAP	3.37306e-16	0.290914	0.634	0.94	9.48978e-12	Low YAP1 Epithelial_cells
SEL1L	4.48547e-16	0.328377	0.391	0.708	1.26194e-11	Low YAP1 Epithelial_cells
TNFAIP3	6.44555e-16	0.430215	0.233	0.437	1.81339e-11	Low YAP1 Epithelial_cells
IGHA1	6.53013e-16	1.1817	0.171	0.351	1.83719e-11	Low YAP1 Epithelial_cells
CXCL1	7.40777e-16	0.265254	0.15	0.3	2.0841e-11	Low YAP1 Epithelial_cells
CTRC	1.48002e-15	2.95692	0.292	0.192	4.16388e-11	Low YAP1 Epithelial_cells
CELA3B	2.78205e-15	3.00798	0.286	0.188	7.82701e-11	Low YAP1 Epithelial_cells
MMP2	5.75139e-15	0.426627	0.125	0.259	1.6181e-10	Low YAP1 Epithelial_cells
GOLGA8B	2.38283e-14	0.801797	0.192	0.354	6.70385e-10	Low YAP1 Epithelial_cells
RGCC	3.00589e-14	0.396513	0.146	0.29	8.45678e-10	Low YAP1 Epithelial_cells
PRSS1	7.12678e-14	3.39247	0.333	0.248	2.00505e-09	Low YAP1 Epithelial_cells
MUC1	3.07552e-13	-0.306509	0.703	0.814	8.65268e-09	Low YAP1 Epithelial_cells
GP2	5.46615e-13	2.94163	0.348	0.274	1.53785e-08	Low YAP1 Epithelial_cells
NFKBIA	8.54763e-13	0.404908	0.488	0.79	2.40479e-08	Low YAP1 Epithelial_cells
SOD2	1.80258e-12	0.305407	0.504	0.798	5.07137e-08	Low YAP1 Epithelial_cells
CLU	1.86018e-12	-0.586521	0.458	0.606	5.23342e-08	Low YAP1 Epithelial_cells
GPNMB	4.45378e-12	0.444127	0.131	0.254	1.25303e-07	Low YAP1 Epithelial_cells
ANPEP	1.99072e-11	0.502829	0.251	0.162	5.6007e-07	Low YAP1 Epithelial_cells
NUCB2	2.2779e-11	0.326839	0.356	0.632	6.40865e-07	Low YAP1 Epithelial_cells
APOC1	4.34134e-11	0.574236	0.217	0.386	1.22139e-06	Low YAP1 Epithelial_cells
PRSS2	1.33543e-10	3.16692	0.386	0.344	3.7571e-06	Low YAP1 Epithelial_cells
TIMP3	2.13045e-10	0.601763	0.16	0.289	5.9938e-06	Low YAP1 Epithelial_cells
IGHG4	7.58184e-10	0.818833	0.182	0.33	2.13307e-05	Low YAP1 Epithelial_cells
CXCL2	8.25031e-10	0.367419	0.2	0.34	2.32114e-05	Low YAP1 Epithelial_cells
CXCL3	1.01539e-09	0.421478	0.236	0.394	2.85669e-05	Low YAP1 Epithelial_cells
XBP1	1.05908e-09	0.258398	0.454	0.732	2.97961e-05	Low YAP1 Epithelial_cells
VIM	1.41939e-09	0.947396	0.605	0.654	3.9933e-05	Low YAP1 Epithelial_cells
SPINK1	7.09481e-09	1.58476	0.491	0.522	0.000199605	Low YAP1 Epithelial_cells
COL6A2	1.01045e-08	0.657463	0.161	0.282	0.00028428	Low YAP1 Epithelial_cells
MT1X	4.07146e-08	0.583438	0.416	0.691	0.00114546	Low YAP1 Epithelial_cells
NUPR1	6.91453e-08	1.03828	0.342	0.311	0.00194533	Low YAP1 Epithelial_cells
BACE1	1.85513e-07	0.271815	0.221	0.356	0.00521921	Low YAP1 Epithelial_cells
LGALS1	4.07955e-07	0.695131	0.319	0.507	0.0114774	Low YAP1 Epithelial_cells
IGKC	7.08045e-07	1.49583	0.363	0.605	0.0199201	Low YAP1 Epithelial_cells
HLA-DRA	3.71324e-06	0.435186	0.496	0.724	0.104468	Low YAP1 Epithelial_cells
G0S2	1.19492e-05	0.52669	0.16	0.251	0.336178	Low YAP1 Epithelial_cells
TAGLN	1.58021e-05	0.523158	0.203	0.307	0.444577	Low YAP1 Epithelial_cells
MT1G	5.55538e-05	1.37372	0.284	0.263	1	Low YAP1 Epithelial_cells
LUM	0.000518912	1.04606	0.244	0.37	1	Low YAP1 Epithelial_cells
IGLC2	0.00090115	1.4937	0.291	0.455	1	Low YAP1 Epithelial_cells
AL121761.1	0.000954428	0.426992	0.22	0.309	1	Low YAP1 Epithelial_cells
FTL	0.00651421	0.311544	0.952	0.985	1	Low YAP1 Epithelial_cells
PRSS3	0.00908749	2.1065	0.337	0.516	1	Low YAP1 Epithelial_cells
YAP1.1	0	1.35713	1	0	0	High YAP1 Epithelial_cells
CXADR.1	1.8606e-142	0.475039	0.783	0.245	5.2346e-138	High YAP1 Epithelial_cells
NDUFS2.1	2.16893e-139	0.352143	0.777	0.26	6.10206e-135	High YAP1 Epithelial_cells
ELK4.1	2.18001e-139	0.353869	0.69	0.182	6.13324e-135	High YAP1 Epithelial_cells
PAFAH1B3.1	2.52553e-139	0.2895	0.601	0.139	7.10532e-135	High YAP1 Epithelial_cells
SERINC5.1	9.91317e-139	0.302865	0.673	0.169	2.78897e-134	High YAP1 Epithelial_cells
SCCPDH.1	2.8916e-137	0.37382	0.709	0.211	8.13521e-133	High YAP1 Epithelial_cells
EPRS.1	3.00445e-137	0.473079	0.796	0.285	8.45271e-133	High YAP1 Epithelial_cells
MRPL27.1	4.69077e-133	0.267561	0.733	0.22	1.3197e-128	High YAP1 Epithelial_cells
EHF.1	6.17937e-133	0.390478	0.782	0.24	1.7385e-128	High YAP1 Epithelial_cells
IARS2.1	1.95285e-132	0.381809	0.765	0.254	5.49414e-128	High YAP1 Epithelial_cells
ABLIM1.1	2.12375e-132	0.456672	0.767	0.244	5.97496e-128	High YAP1 Epithelial_cells
PPM1G.1	4.81573e-132	0.286037	0.789	0.262	1.35486e-127	High YAP1 Epithelial_cells
ZMAT2.1	1.06005e-131	0.284059	0.772	0.248	2.98233e-127	High YAP1 Epithelial_cells
RAB14.1	1.70979e-131	0.328262	0.789	0.258	4.81032e-127	High YAP1 Epithelial_cells
PLEKHA1.1	2.2275e-131	0.281245	0.712	0.208	6.26686e-127	High YAP1 Epithelial_cells
USP1.1	3.4026e-131	0.357885	0.606	0.15	9.57289e-127	High YAP1 Epithelial_cells
SMC3.1	4.42168e-131	0.490619	0.734	0.23	1.24399e-126	High YAP1 Epithelial_cells
PSENEN.1	4.90132e-131	0.264645	0.719	0.214	1.37894e-126	High YAP1 Epithelial_cells
GIPC1.1	1.15562e-130	0.301954	0.743	0.223	3.25121e-126	High YAP1 Epithelial_cells
LRRC8A.1	1.41603e-130	0.354582	0.633	0.161	3.98387e-126	High YAP1 Epithelial_cells
SPTSSA.1	2.29979e-130	0.302238	0.647	0.169	6.47024e-126	High YAP1 Epithelial_cells
ACSL5.1	2.4117e-130	0.29553	0.573	0.122	6.78506e-126	High YAP1 Epithelial_cells
UHMK1.1	2.42124e-130	0.276913	0.744	0.227	6.81192e-126	High YAP1 Epithelial_cells
LPGAT1.1	3.72658e-130	0.388123	0.795	0.268	1.04843e-125	High YAP1 Epithelial_cells
INAVA.1	8.07613e-130	0.349952	0.729	0.222	2.27214e-125	High YAP1 Epithelial_cells
OXR1.1	8.12461e-130	0.299793	0.669	0.18	2.28578e-125	High YAP1 Epithelial_cells
TFAP2A.1	8.64289e-129	0.293982	0.479	0.081	2.43159e-124	High YAP1 Epithelial_cells
DEK.1	9.65013e-129	0.638942	0.913	0.403	2.71497e-124	High YAP1 Epithelial_cells
REEP3.1	1.2984e-128	0.318265	0.714	0.214	3.65291e-124	High YAP1 Epithelial_cells
ARPC5L.1	1.35452e-128	0.257477	0.683	0.2	3.81079e-124	High YAP1 Epithelial_cells
PDCD10.1	1.41113e-128	0.272274	0.712	0.21	3.97008e-124	High YAP1 Epithelial_cells
CDC73.1	5.76628e-128	0.265283	0.676	0.194	1.62229e-123	High YAP1 Epithelial_cells
ERBIN.1	6.17807e-128	0.329656	0.735	0.229	1.73814e-123	High YAP1 Epithelial_cells
DUSP23.1	1.40895e-127	0.277913	0.708	0.204	3.96395e-123	High YAP1 Epithelial_cells
ACBD3.1	1.46225e-127	0.505748	0.783	0.282	4.1139e-123	High YAP1 Epithelial_cells
KCTD3.1	2.28435e-127	0.254885	0.662	0.181	6.42678e-123	High YAP1 Epithelial_cells
MRPL14.1	2.49519e-127	0.285502	0.768	0.253	7.01998e-123	High YAP1 Epithelial_cells
TIPRL.1	2.66648e-127	0.267181	0.627	0.167	7.50186e-123	High YAP1 Epithelial_cells
ARID4B.1	3.05896e-127	0.408609	0.82	0.304	8.60607e-123	High YAP1 Epithelial_cells
VPS36.1	4.04609e-127	0.287808	0.699	0.203	1.13833e-122	High YAP1 Epithelial_cells
ANP32A.1	4.21724e-127	0.343696	0.779	0.263	1.18648e-122	High YAP1 Epithelial_cells
ADSS.1	5.9449e-127	0.425338	0.699	0.216	1.67254e-122	High YAP1 Epithelial_cells
C1GALT1.1	7.04022e-127	0.349372	0.66	0.187	1.98069e-122	High YAP1 Epithelial_cells
TJP2.1	7.12654e-127	0.313363	0.728	0.215	2.00498e-122	High YAP1 Epithelial_cells
APH1A.1	9.14284e-127	0.30021	0.813	0.298	2.57225e-122	High YAP1 Epithelial_cells
SLTM.1	2.20647e-126	0.356059	0.822	0.288	6.20768e-122	High YAP1 Epithelial_cells
PDZD8.1	1.83804e-125	0.418109	0.706	0.223	5.17115e-121	High YAP1 Epithelial_cells
REXO2.1	4.79924e-125	0.271363	0.666	0.193	1.35022e-120	High YAP1 Epithelial_cells
EIF2AK2.1	4.9147e-125	0.333049	0.761	0.262	1.3827e-120	High YAP1 Epithelial_cells
CCDC6.1	6.08799e-125	0.320835	0.758	0.255	1.71279e-120	High YAP1 Epithelial_cells
KNOP1.1	9.83157e-125	0.281561	0.676	0.191	2.76601e-120	High YAP1 Epithelial_cells
SLFN5.1	1.04988e-124	0.267749	0.613	0.152	2.95374e-120	High YAP1 Epithelial_cells
SUGT1.1	1.98682e-124	0.299522	0.743	0.237	5.58971e-120	High YAP1 Epithelial_cells
NR2F2.1	2.04634e-124	0.355387	0.655	0.182	5.75719e-120	High YAP1 Epithelial_cells
RANBP1.1	2.2419e-124	0.269262	0.75	0.246	6.30735e-120	High YAP1 Epithelial_cells
PARP9.1	4.15666e-124	0.279464	0.63	0.166	1.16943e-119	High YAP1 Epithelial_cells
PARP1.1	4.45441e-124	0.44164	0.771	0.281	1.2532e-119	High YAP1 Epithelial_cells
NECTIN4.1	4.51643e-124	0.328263	0.606	0.149	1.27065e-119	High YAP1 Epithelial_cells
MYO10.1	9.27645e-124	0.351572	0.688	0.207	2.60984e-119	High YAP1 Epithelial_cells
PITPNB.1	9.34514e-124	0.298867	0.697	0.21	2.62916e-119	High YAP1 Epithelial_cells
PLEKHA5.1	2.27564e-123	0.319737	0.7	0.2	6.40228e-119	High YAP1 Epithelial_cells
NCKAP1.1	5.81906e-123	0.311506	0.821	0.29	1.63714e-118	High YAP1 Epithelial_cells
HNRNPF.1	7.19964e-123	0.307743	0.814	0.301	2.02555e-118	High YAP1 Epithelial_cells
MRPS34.1	1.53073e-122	0.350574	0.768	0.273	4.30655e-118	High YAP1 Epithelial_cells
KIF13B.1	2.11192e-122	0.30441	0.686	0.198	5.94168e-118	High YAP1 Epithelial_cells
SRPK1.1	4.36362e-122	0.267385	0.652	0.189	1.22766e-117	High YAP1 Epithelial_cells
PTPN14.1	4.72652e-122	0.346461	0.559	0.131	1.32976e-117	High YAP1 Epithelial_cells
BAG3.1	5.09081e-122	0.25044	0.535	0.114	1.43225e-117	High YAP1 Epithelial_cells
LYPLA1.1	6.59262e-122	0.2829	0.704	0.227	1.85477e-117	High YAP1 Epithelial_cells
TRAF4.1	8.43458e-122	0.252523	0.624	0.161	2.37298e-117	High YAP1 Epithelial_cells
MAML2.1	8.94649e-122	0.301279	0.61	0.152	2.517e-117	High YAP1 Epithelial_cells
ATP1B3.1	9.59431e-122	0.435887	0.665	0.201	2.69926e-117	High YAP1 Epithelial_cells
URI1.1	1.98629e-121	0.308014	0.741	0.25	5.58823e-117	High YAP1 Epithelial_cells
MYOF.1	2.1347e-121	0.395136	0.704	0.212	6.00575e-117	High YAP1 Epithelial_cells
CLTA.1	3.34393e-121	0.345685	0.876	0.381	9.40782e-117	High YAP1 Epithelial_cells
SLC39A10.1	4.10096e-121	0.331899	0.617	0.158	1.15376e-116	High YAP1 Epithelial_cells
KDM5B.1	9.86349e-121	0.386652	0.804	0.293	2.77499e-116	High YAP1 Epithelial_cells
NENF.1	1.45338e-120	0.411357	0.813	0.321	4.08895e-116	High YAP1 Epithelial_cells
SLC39A4.1	1.74016e-120	0.302992	0.655	0.194	4.89578e-116	High YAP1 Epithelial_cells
BRD7.1	1.7867e-120	0.283292	0.785	0.277	5.0267e-116	High YAP1 Epithelial_cells
MRPS21.1	1.78877e-120	0.371838	0.839	0.355	5.03253e-116	High YAP1 Epithelial_cells
SMARCE1.1	2.00072e-120	0.337191	0.789	0.269	5.62883e-116	High YAP1 Epithelial_cells
NASP.1	3.38842e-120	0.371766	0.72	0.227	9.53299e-116	High YAP1 Epithelial_cells
HIST1H2AC.1	1.26617e-119	0.362402	0.648	0.175	3.56225e-115	High YAP1 Epithelial_cells
MCM3.1	1.5247e-119	0.262469	0.518	0.106	4.28958e-115	High YAP1 Epithelial_cells
ATP5MC1.1	2.65324e-119	0.374554	0.766	0.291	7.46464e-115	High YAP1 Epithelial_cells
WWP1.1	2.97047e-119	0.343162	0.706	0.227	8.35713e-115	High YAP1 Epithelial_cells
BAG1.1	3.78541e-119	0.286955	0.739	0.25	1.06499e-114	High YAP1 Epithelial_cells
WWTR1.1	5.00083e-119	0.335601	0.719	0.22	1.40693e-114	High YAP1 Epithelial_cells
SCNN1A.1	5.71835e-119	0.270633	0.681	0.193	1.6088e-114	High YAP1 Epithelial_cells
BCL2L1.1	9.26458e-119	0.308244	0.76	0.248	2.6065e-114	High YAP1 Epithelial_cells
RAB25.1	1.67726e-118	0.26288	0.775	0.277	4.71881e-114	High YAP1 Epithelial_cells
STAG2.1	1.74001e-118	0.293232	0.771	0.255	4.89536e-114	High YAP1 Epithelial_cells
MBOAT2.1	1.77562e-118	0.295222	0.553	0.128	4.99552e-114	High YAP1 Epithelial_cells
RNF7.1	2.27014e-118	0.27692	0.799	0.306	6.38681e-114	High YAP1 Epithelial_cells
AP1M2.1	2.61692e-118	0.288485	0.666	0.198	7.36245e-114	High YAP1 Epithelial_cells
IGF2BP2.1	3.82881e-118	0.257574	0.632	0.162	1.0772e-113	High YAP1 Epithelial_cells
EFNB2.1	4.51546e-118	0.398435	0.621	0.165	1.27038e-113	High YAP1 Epithelial_cells
HOXB7.1	7.166e-118	0.26614	0.487	0.096	2.01608e-113	High YAP1 Epithelial_cells
GADD45A.1	8.48953e-118	0.366204	0.674	0.196	2.38844e-113	High YAP1 Epithelial_cells
TMCO1.1	1.43702e-117	0.526075	0.869	0.373	4.04292e-113	High YAP1 Epithelial_cells
TOP1.1	2.0165e-117	0.477785	0.865	0.365	5.67323e-113	High YAP1 Epithelial_cells
HNRNPR.1	2.18689e-117	0.346717	0.831	0.319	6.1526e-113	High YAP1 Epithelial_cells
TMEM141.1	3.27634e-117	0.355927	0.692	0.232	9.21764e-113	High YAP1 Epithelial_cells
ATP2B4.1	4.2789e-117	0.324683	0.705	0.226	1.20383e-112	High YAP1 Epithelial_cells
NBR1.1	7.76688e-117	0.264733	0.703	0.219	2.18513e-112	High YAP1 Epithelial_cells
ATP2A2.1	8.74605e-117	0.262981	0.736	0.249	2.46061e-112	High YAP1 Epithelial_cells
MEIS2.1	9.30459e-117	0.377936	0.702	0.215	2.61775e-112	High YAP1 Epithelial_cells
PPL.1	1.19815e-116	0.31319	0.624	0.17	3.37087e-112	High YAP1 Epithelial_cells
ENSA.1	2.49856e-116	0.287507	0.806	0.306	7.02945e-112	High YAP1 Epithelial_cells
U2SURP.1	2.91254e-116	0.438333	0.799	0.307	8.19415e-112	High YAP1 Epithelial_cells
GPATCH4.1	3.50719e-116	0.282928	0.551	0.136	9.86713e-112	High YAP1 Epithelial_cells
NME3.1	7.29558e-116	0.276308	0.778	0.273	2.05254e-111	High YAP1 Epithelial_cells
SUPT16H.1	7.87326e-116	0.263859	0.754	0.251	2.21506e-111	High YAP1 Epithelial_cells
SLK.1	1.82051e-115	0.447169	0.778	0.292	5.12183e-111	High YAP1 Epithelial_cells
SFT2D2.1	2.43452e-115	0.29039	0.671	0.204	6.84928e-111	High YAP1 Epithelial_cells
ADGRG1.1	4.42564e-115	0.297959	0.713	0.231	1.24511e-110	High YAP1 Epithelial_cells
CFAP298.1	4.7066e-115	0.264359	0.68	0.208	1.32416e-110	High YAP1 Epithelial_cells
CD47.1	7.89189e-115	0.251228	0.804	0.292	2.22031e-110	High YAP1 Epithelial_cells
FAM204A.1	9.86014e-115	0.268718	0.668	0.203	2.77405e-110	High YAP1 Epithelial_cells
NUFIP2.1	1.11509e-114	0.283003	0.811	0.291	3.13719e-110	High YAP1 Epithelial_cells
TMOD3.1	2.66098e-114	0.34643	0.801	0.295	7.48639e-110	High YAP1 Epithelial_cells
XRCC5.1	2.91558e-114	0.322274	0.9	0.393	8.20268e-110	High YAP1 Epithelial_cells
FNBP1L.1	3.33293e-114	0.250159	0.74	0.241	9.37687e-110	High YAP1 Epithelial_cells
CEP350.1	3.81631e-114	0.285605	0.745	0.255	1.07368e-109	High YAP1 Epithelial_cells
TJP1.1	4.33488e-114	0.327289	0.843	0.314	1.21958e-109	High YAP1 Epithelial_cells
UFC1.1	5.65745e-114	0.324741	0.815	0.344	1.59167e-109	High YAP1 Epithelial_cells
PPA1.1	1.34925e-113	0.540515	0.881	0.436	3.79597e-109	High YAP1 Epithelial_cells
RHPN2.1	1.38956e-113	0.284874	0.571	0.143	3.9094e-109	High YAP1 Epithelial_cells
VCP.1	1.58568e-113	0.285063	0.772	0.284	4.46114e-109	High YAP1 Epithelial_cells
TMEM123.1	1.65739e-113	0.279281	0.846	0.352	4.6629e-109	High YAP1 Epithelial_cells
C19orf53.1	2.74274e-113	0.309466	0.833	0.353	7.71643e-109	High YAP1 Epithelial_cells
SESTD1.1	2.76808e-113	0.267454	0.6	0.159	7.78772e-109	High YAP1 Epithelial_cells
STAT1.1	3.56126e-113	0.269371	0.742	0.247	1.00193e-108	High YAP1 Epithelial_cells
THOC2.1	1.71928e-112	0.265142	0.766	0.269	4.83703e-108	High YAP1 Epithelial_cells
PARP14.1	4.48667e-112	0.291906	0.756	0.257	1.26228e-107	High YAP1 Epithelial_cells
CCT3.1	5.19456e-112	0.333053	0.837	0.354	1.46144e-107	High YAP1 Epithelial_cells
LINC01133.1	5.92072e-112	0.28161	0.517	0.115	1.66574e-107	High YAP1 Epithelial_cells
ZFP91.1	6.47061e-112	0.253059	0.723	0.244	1.82044e-107	High YAP1 Epithelial_cells
PAK2.1	7.71706e-112	0.315157	0.809	0.307	2.17112e-107	High YAP1 Epithelial_cells
TPR.1	8.08564e-112	0.436726	0.855	0.35	2.27481e-107	High YAP1 Epithelial_cells
AIDA.1	9.13069e-112	0.255981	0.643	0.203	2.56883e-107	High YAP1 Epithelial_cells
DGKH.1	1.24778e-111	0.257736	0.579	0.145	3.5105e-107	High YAP1 Epithelial_cells
SNW1.1	3.31783e-111	0.260029	0.716	0.233	9.33437e-107	High YAP1 Epithelial_cells
SNRPE.1	3.439e-111	0.296599	0.82	0.339	9.67529e-107	High YAP1 Epithelial_cells
FAM120A.1	4.63629e-111	0.363298	0.812	0.337	1.30437e-106	High YAP1 Epithelial_cells
NDUFS6.1	6.62399e-111	0.350809	0.849	0.369	1.86359e-106	High YAP1 Epithelial_cells
SF3B6.1	8.36219e-111	0.264613	0.803	0.316	2.35262e-106	High YAP1 Epithelial_cells
WASF2.1	1.66418e-110	0.289111	0.848	0.344	4.68201e-106	High YAP1 Epithelial_cells
CLINT1.1	1.80151e-110	0.483076	0.832	0.343	5.06837e-106	High YAP1 Epithelial_cells
TMEM63A.1	1.81943e-110	0.294019	0.787	0.276	5.11879e-106	High YAP1 Epithelial_cells
FOXQ1.1	2.39858e-110	0.438121	0.656	0.2	6.74817e-106	High YAP1 Epithelial_cells
PAWR.1	4.54894e-110	0.26143	0.727	0.235	1.2798e-105	High YAP1 Epithelial_cells
UBE2H.1	4.77905e-110	0.388576	0.793	0.324	1.34454e-105	High YAP1 Epithelial_cells
SEPTIN7.1	4.79226e-110	0.296214	0.865	0.335	1.34825e-105	High YAP1 Epithelial_cells
VASP.1	5.87428e-110	0.398475	0.787	0.291	1.65267e-105	High YAP1 Epithelial_cells
DSG2.1	7.01559e-110	0.402281	0.865	0.379	1.97377e-105	High YAP1 Epithelial_cells
SYF2.1	7.48338e-110	0.32418	0.869	0.366	2.10537e-105	High YAP1 Epithelial_cells
PRKDC.1	1.01159e-109	0.370482	0.759	0.29	2.846e-105	High YAP1 Epithelial_cells
IFI16.1	1.37116e-109	0.385501	0.658	0.201	3.85761e-105	High YAP1 Epithelial_cells
KRT10.1	1.72309e-109	0.352361	0.795	0.326	4.84774e-105	High YAP1 Epithelial_cells
TOR1AIP2.1	1.7362e-109	0.272565	0.785	0.294	4.88463e-105	High YAP1 Epithelial_cells
SKAP2.1	2.19192e-109	0.292969	0.605	0.167	6.16675e-105	High YAP1 Epithelial_cells
PTBP3.1	2.23616e-109	0.43819	0.766	0.295	6.2912e-105	High YAP1 Epithelial_cells
GADD45GIP1.1	2.4263e-109	0.326449	0.833	0.345	6.82615e-105	High YAP1 Epithelial_cells
RSRC2.1	2.77054e-109	0.256085	0.825	0.321	7.79464e-105	High YAP1 Epithelial_cells
XRN2.1	3.14837e-109	0.374058	0.769	0.275	8.85761e-105	High YAP1 Epithelial_cells
FERMT1.1	3.36364e-109	0.391719	0.605	0.164	9.46327e-105	High YAP1 Epithelial_cells
AP2B1.1	3.48019e-109	0.25845	0.818	0.307	9.79116e-105	High YAP1 Epithelial_cells
LAMTOR5.1	3.50131e-109	0.267838	0.831	0.337	9.85058e-105	High YAP1 Epithelial_cells
ZNF292.1	4.14798e-109	0.318228	0.747	0.257	1.16699e-104	High YAP1 Epithelial_cells
CBX3.1	4.40407e-109	0.373296	0.846	0.358	1.23904e-104	High YAP1 Epithelial_cells
RALBP1.1	9.36381e-109	0.323075	0.817	0.304	2.63442e-104	High YAP1 Epithelial_cells
SP100.1	1.00558e-108	0.263125	0.773	0.282	2.82911e-104	High YAP1 Epithelial_cells
DNAJC21.1	1.00912e-108	0.314157	0.706	0.241	2.83906e-104	High YAP1 Epithelial_cells
COPB2.1	1.07002e-108	0.267693	0.745	0.275	3.01039e-104	High YAP1 Epithelial_cells
DNAJC15.1	1.21983e-108	0.373555	0.848	0.365	3.43187e-104	High YAP1 Epithelial_cells
MRPL57.1	1.33255e-108	0.294711	0.812	0.33	3.74899e-104	High YAP1 Epithelial_cells
RRP15.1	2.11482e-108	0.276544	0.556	0.149	5.94983e-104	High YAP1 Epithelial_cells
DYNC1LI2.1	2.98048e-108	0.275659	0.819	0.318	8.38529e-104	High YAP1 Epithelial_cells
SLCO3A1.1	4.02996e-108	0.283135	0.542	0.132	1.13379e-103	High YAP1 Epithelial_cells
ZNF704.1	4.34516e-108	0.301558	0.628	0.188	1.22247e-103	High YAP1 Epithelial_cells
LAD1.1	7.14495e-108	0.315493	0.793	0.298	2.01016e-103	High YAP1 Epithelial_cells
NUCKS1.1	7.55825e-108	0.688204	0.948	0.536	2.12644e-103	High YAP1 Epithelial_cells
KIF5B.1	9.04966e-108	0.348899	0.854	0.362	2.54603e-103	High YAP1 Epithelial_cells
ASH1L.1	2.96893e-107	0.31438	0.828	0.328	8.35277e-103	High YAP1 Epithelial_cells
RSF1.1	3.05765e-107	0.302297	0.794	0.294	8.6024e-103	High YAP1 Epithelial_cells
LITAF.1	3.68604e-107	0.289401	0.819	0.315	1.03703e-102	High YAP1 Epithelial_cells
CTDSPL.1	4.75646e-107	0.256917	0.621	0.174	1.33818e-102	High YAP1 Epithelial_cells
MTPN.1	5.13188e-107	0.252674	0.792	0.297	1.4438e-102	High YAP1 Epithelial_cells
FAM3C.1	1.03993e-106	0.324408	0.766	0.294	2.92573e-102	High YAP1 Epithelial_cells
EPS8.1	1.33162e-106	0.391098	0.754	0.267	3.74639e-102	High YAP1 Epithelial_cells
UPF3A.1	1.57955e-106	0.264012	0.662	0.209	4.44389e-102	High YAP1 Epithelial_cells
ZC3H15.1	1.72595e-106	0.31178	0.811	0.332	4.8558e-102	High YAP1 Epithelial_cells
SNRPD2.1	2.61986e-106	0.369414	0.896	0.443	7.37071e-102	High YAP1 Epithelial_cells
THRAP3.1	5.22387e-106	0.260567	0.812	0.317	1.46968e-101	High YAP1 Epithelial_cells
NIPBL.1	5.64204e-106	0.313543	0.771	0.285	1.58733e-101	High YAP1 Epithelial_cells
SSB.1	5.94769e-106	0.262581	0.773	0.28	1.67332e-101	High YAP1 Epithelial_cells
RBM47.1	7.47198e-106	0.273348	0.784	0.297	2.10217e-101	High YAP1 Epithelial_cells
ARSD.1	1.20726e-105	0.290475	0.749	0.275	3.39651e-101	High YAP1 Epithelial_cells
ZNF106.1	1.24091e-105	0.253339	0.713	0.24	3.49117e-101	High YAP1 Epithelial_cells
PRPF40A.1	1.41461e-105	0.29586	0.801	0.315	3.97985e-101	High YAP1 Epithelial_cells
TMEM219.1	2.25303e-105	0.255873	0.825	0.346	6.33866e-101	High YAP1 Epithelial_cells
GALNT3.1	2.26865e-105	0.280965	0.788	0.291	6.38261e-101	High YAP1 Epithelial_cells
KCNK1.1	3.02103e-105	0.353587	0.659	0.204	8.49938e-101	High YAP1 Epithelial_cells
CBX5.1	4.3549e-105	0.277799	0.727	0.25	1.22521e-100	High YAP1 Epithelial_cells
FAIM.1	4.99653e-105	0.281728	0.608	0.178	1.40572e-100	High YAP1 Epithelial_cells
MGMT.1	5.61752e-105	0.326634	0.679	0.246	1.58043e-100	High YAP1 Epithelial_cells
FBL.1	1.07133e-104	0.252639	0.741	0.286	3.01408e-100	High YAP1 Epithelial_cells
TES.1	1.71611e-104	0.31781	0.727	0.254	4.8281e-100	High YAP1 Epithelial_cells
GSPT1.1	3.38363e-104	0.282311	0.804	0.329	9.51951e-100	High YAP1 Epithelial_cells
CAPN2.1	4.29044e-104	0.337509	0.803	0.315	1.20707e-99	High YAP1 Epithelial_cells
TBCA.1	7.55379e-104	0.369421	0.893	0.414	2.12518e-99	High YAP1 Epithelial_cells
CRIP2.1	9.0723e-104	0.292266	0.603	0.177	2.5524e-99	High YAP1 Epithelial_cells
COX20.1	1.78948e-103	0.327485	0.788	0.301	5.03454e-99	High YAP1 Epithelial_cells
EIF4G1.1	2.94036e-103	0.269642	0.838	0.347	8.2724e-99	High YAP1 Epithelial_cells
CKLF.1	3.42308e-103	0.350091	0.744	0.27	9.6305e-99	High YAP1 Epithelial_cells
DDX18.1	6.18046e-103	0.253356	0.801	0.31	1.73881e-98	High YAP1 Epithelial_cells
CDC42EP5.1	6.2104e-103	0.339284	0.727	0.266	1.74723e-98	High YAP1 Epithelial_cells
SMIM22.1	8.4487e-103	0.554089	0.902	0.472	2.37696e-98	High YAP1 Epithelial_cells
DNAJC8.1	1.6682e-102	0.274994	0.738	0.27	4.6933e-98	High YAP1 Epithelial_cells
DDX46.1	1.82263e-102	0.297136	0.803	0.32	5.12778e-98	High YAP1 Epithelial_cells
ANP32B.1	2.01946e-102	0.325578	0.849	0.389	5.68155e-98	High YAP1 Epithelial_cells
TNFSF10.1	3.62699e-102	0.2536	0.663	0.212	1.02042e-97	High YAP1 Epithelial_cells
EIF2S2.1	4.25983e-102	0.415818	0.878	0.424	1.19846e-97	High YAP1 Epithelial_cells
NDUFB1.1	4.92148e-102	0.284873	0.874	0.406	1.38461e-97	High YAP1 Epithelial_cells
TM9SF3.1	5.83117e-102	0.410696	0.915	0.451	1.64054e-97	High YAP1 Epithelial_cells
BLVRB.1	6.29361e-102	0.383516	0.809	0.342	1.77064e-97	High YAP1 Epithelial_cells
NET1.1	7.21124e-102	0.387705	0.671	0.228	2.02881e-97	High YAP1 Epithelial_cells
MRPL20.1	7.68608e-102	0.260517	0.857	0.372	2.1624e-97	High YAP1 Epithelial_cells
GSTM3.1	8.26856e-102	0.369858	0.656	0.233	2.32628e-97	High YAP1 Epithelial_cells
TRIM29.1	1.18992e-101	0.295525	0.534	0.139	3.34773e-97	High YAP1 Epithelial_cells
PPCS.1	2.04817e-101	0.283854	0.743	0.286	5.76233e-97	High YAP1 Epithelial_cells
MT-CO1.1	2.37577e-101	0.773053	0.993	0.95	6.68399e-97	High YAP1 Epithelial_cells
MPHOSPH8.1	3.55103e-101	0.27532	0.813	0.323	9.99046e-97	High YAP1 Epithelial_cells
NAPRT.1	3.87485e-101	0.34622	0.522	0.136	1.09015e-96	High YAP1 Epithelial_cells
FARP1.1	4.14237e-101	0.305881	0.723	0.257	1.16542e-96	High YAP1 Epithelial_cells
SVIL.1	4.37455e-101	0.254217	0.624	0.195	1.23073e-96	High YAP1 Epithelial_cells
IFI44L.1	4.88945e-101	0.43235	0.485	0.113	1.3756e-96	High YAP1 Epithelial_cells
SRRM1.1	5.334e-101	0.310712	0.889	0.382	1.50067e-96	High YAP1 Epithelial_cells
PRR15L.1	5.82626e-101	0.288961	0.521	0.144	1.63916e-96	High YAP1 Epithelial_cells
STAU1.1	7.27419e-101	0.274336	0.827	0.359	2.04652e-96	High YAP1 Epithelial_cells
ARHGAP5.1	1.24281e-100	0.306998	0.82	0.346	3.49654e-96	High YAP1 Epithelial_cells
ENC1.1	1.75734e-100	0.493492	0.679	0.219	4.94409e-96	High YAP1 Epithelial_cells
ZC3H13.1	1.79678e-100	0.271815	0.783	0.3	5.05505e-96	High YAP1 Epithelial_cells
CDK6.1	1.95992e-100	0.324544	0.681	0.228	5.51403e-96	High YAP1 Epithelial_cells
CTSH.1	2.22377e-100	0.397045	0.812	0.322	6.25635e-96	High YAP1 Epithelial_cells
LPP.1	4.12517e-100	0.283663	0.842	0.331	1.16057e-95	High YAP1 Epithelial_cells
ATP6V1G1.1	6.16909e-100	0.324202	0.868	0.4	1.73561e-95	High YAP1 Epithelial_cells
AKR1C3.1	7.26959e-100	0.339261	0.551	0.152	2.04523e-95	High YAP1 Epithelial_cells
PCBD1.1	9.52679e-100	0.32003	0.728	0.287	2.68027e-95	High YAP1 Epithelial_cells
ABCC3.1	9.84426e-100	0.371942	0.855	0.335	2.76958e-95	High YAP1 Epithelial_cells
CCND1.1	1.04427e-99	0.784092	0.865	0.371	2.93794e-95	High YAP1 Epithelial_cells
MTIF3.1	1.19369e-99	0.256024	0.673	0.235	3.35832e-95	High YAP1 Epithelial_cells
SCP2.1	1.19502e-99	0.257418	0.869	0.412	3.36207e-95	High YAP1 Epithelial_cells
KDELR1.1	2.19064e-99	0.389705	0.88	0.431	6.16314e-95	High YAP1 Epithelial_cells
SH3YL1.1	2.31973e-99	0.500428	0.863	0.403	6.52632e-95	High YAP1 Epithelial_cells
BMP4.1	3.53806e-99	0.259723	0.426	0.084	9.95398e-95	High YAP1 Epithelial_cells
ARPC5.1	5.73753e-99	0.446565	0.887	0.416	1.6142e-94	High YAP1 Epithelial_cells
SOX9.1	6.63771e-99	0.364327	0.771	0.284	1.86745e-94	High YAP1 Epithelial_cells
PLAAT4.1	7.52894e-99	0.345905	0.552	0.152	2.11819e-94	High YAP1 Epithelial_cells
C9orf16.1	8.91062e-99	0.389443	0.804	0.345	2.50691e-94	High YAP1 Epithelial_cells
DNAJC10.1	1.25872e-98	0.276334	0.735	0.281	3.54128e-94	High YAP1 Epithelial_cells
PPIG.1	1.58526e-98	0.251255	0.833	0.347	4.45998e-94	High YAP1 Epithelial_cells
DSC2.1	1.60343e-98	0.423675	0.687	0.235	4.5111e-94	High YAP1 Epithelial_cells
SPATS2L.1	3.1393e-98	0.354653	0.883	0.377	8.83211e-94	High YAP1 Epithelial_cells
RAB2A.1	3.96525e-98	0.367749	0.845	0.405	1.11558e-93	High YAP1 Epithelial_cells
CEACAM1.1	7.05583e-98	0.28535	0.575	0.161	1.98509e-93	High YAP1 Epithelial_cells
HNRNPM.1	1.04835e-97	0.274258	0.859	0.373	2.94942e-93	High YAP1 Epithelial_cells
SMARCA5.1	1.29841e-97	0.255333	0.796	0.317	3.65294e-93	High YAP1 Epithelial_cells
WDR83OS.1	1.47555e-97	0.313755	0.873	0.403	4.1513e-93	High YAP1 Epithelial_cells
HSPH1.1	1.97472e-97	0.271952	0.753	0.275	5.55569e-93	High YAP1 Epithelial_cells
KLF3.1	2.84857e-97	0.276421	0.738	0.273	8.01415e-93	High YAP1 Epithelial_cells
S100A13.1	3.49554e-97	0.406491	0.881	0.382	9.83434e-93	High YAP1 Epithelial_cells
HEBP2.1	5.47555e-97	0.468852	0.871	0.42	1.54049e-92	High YAP1 Epithelial_cells
TOMM20.1	5.57077e-97	0.375086	0.891	0.476	1.56728e-92	High YAP1 Epithelial_cells
DYNC1I2.1	6.39772e-97	0.341157	0.861	0.377	1.79994e-92	High YAP1 Epithelial_cells
TSTD1.1	6.62223e-97	0.260875	0.829	0.37	1.8631e-92	High YAP1 Epithelial_cells
ASS1.1	6.76043e-97	0.415566	0.542	0.16	1.90198e-92	High YAP1 Epithelial_cells
TRIP11.1	1.08587e-96	0.276965	0.823	0.338	3.05498e-92	High YAP1 Epithelial_cells
PARD6B.1	1.27476e-96	0.278188	0.58	0.171	3.5864e-92	High YAP1 Epithelial_cells
COX16.1	1.29624e-96	0.259367	0.804	0.341	3.64685e-92	High YAP1 Epithelial_cells
CCDC186.1	1.60399e-96	0.279284	0.74	0.291	4.51268e-92	High YAP1 Epithelial_cells
HNRNPD.1	2.18876e-96	0.253603	0.868	0.397	6.15785e-92	High YAP1 Epithelial_cells
CLIC3.1	1.20421e-95	0.300429	0.55	0.15	3.38792e-91	High YAP1 Epithelial_cells
AHCYL1.1	2.38077e-95	0.334478	0.823	0.334	6.69805e-91	High YAP1 Epithelial_cells
CLDN7.1	2.54151e-95	0.397497	0.869	0.383	7.15027e-91	High YAP1 Epithelial_cells
UBXN4.1	6.4534e-95	0.363232	0.885	0.428	1.8156e-90	High YAP1 Epithelial_cells
LMO4.1	9.30056e-95	0.420389	0.801	0.33	2.61662e-90	High YAP1 Epithelial_cells
ZNHIT1.1	1.18097e-94	0.275926	0.845	0.375	3.32254e-90	High YAP1 Epithelial_cells
TCEA1.1	2.24791e-94	0.339413	0.851	0.396	6.32427e-90	High YAP1 Epithelial_cells
ROMO1.1	2.88745e-94	0.307317	0.87	0.408	8.12355e-90	High YAP1 Epithelial_cells
SUB1.1	3.91973e-94	0.301912	0.89	0.438	1.10278e-89	High YAP1 Epithelial_cells
CD2AP.1	4.06045e-94	0.305857	0.83	0.359	1.14237e-89	High YAP1 Epithelial_cells
CHMP3.1	5.03463e-94	0.269409	0.845	0.386	1.41644e-89	High YAP1 Epithelial_cells
CITED4.1	9.56611e-94	0.389634	0.694	0.239	2.69133e-89	High YAP1 Epithelial_cells
SET.1	1.02106e-93	0.429752	0.913	0.481	2.87264e-89	High YAP1 Epithelial_cells
TAX1BP1.1	1.24307e-93	0.399814	0.885	0.427	3.49725e-89	High YAP1 Epithelial_cells
PRDX2.1	2.17814e-93	0.256158	0.83	0.382	6.12797e-89	High YAP1 Epithelial_cells
ANXA11.1	4.48832e-93	0.266122	0.881	0.407	1.26274e-88	High YAP1 Epithelial_cells
GCC2.1	4.61471e-93	0.353061	0.878	0.386	1.2983e-88	High YAP1 Epithelial_cells
HNRNPAB.1	1.17847e-92	0.259295	0.819	0.361	3.31551e-88	High YAP1 Epithelial_cells
BZW1.1	1.4993e-92	0.256609	0.821	0.35	4.21814e-88	High YAP1 Epithelial_cells
ITGB4.1	1.52237e-92	0.263582	0.768	0.28	4.28304e-88	High YAP1 Epithelial_cells
NFIA.1	1.73728e-92	0.258816	0.802	0.333	4.88765e-88	High YAP1 Epithelial_cells
NDUFB11.1	3.63768e-92	0.268653	0.858	0.416	1.02342e-87	High YAP1 Epithelial_cells
EIF1AX.1	3.77032e-92	0.306376	0.886	0.441	1.06074e-87	High YAP1 Epithelial_cells
MUC20.1	5.02695e-92	0.269544	0.555	0.166	1.41428e-87	High YAP1 Epithelial_cells
CSNK1A1.1	5.65716e-92	0.276869	0.879	0.403	1.59159e-87	High YAP1 Epithelial_cells
MIDN.1	1.26552e-91	0.317819	0.808	0.336	3.5604e-87	High YAP1 Epithelial_cells
PHACTR3.1	1.87083e-91	0.433857	0.35	0.059	5.26338e-87	High YAP1 Epithelial_cells
MACROD2.1	8.219e-91	0.251661	0.395	0.079	2.31233e-86	High YAP1 Epithelial_cells
MAL2.1	8.64185e-91	0.510714	0.852	0.396	2.4313e-86	High YAP1 Epithelial_cells
MGST3.1	8.91387e-91	0.287191	0.888	0.422	2.50783e-86	High YAP1 Epithelial_cells
ATP5PF.1	1.00785e-90	0.264555	0.885	0.441	2.8355e-86	High YAP1 Epithelial_cells
COX7B.1	1.77883e-90	0.262881	0.888	0.433	5.00457e-86	High YAP1 Epithelial_cells
KMT2A.1	2.35495e-90	0.253541	0.801	0.332	6.62541e-86	High YAP1 Epithelial_cells
ANO1.1	3.36952e-90	0.297015	0.435	0.098	9.47981e-86	High YAP1 Epithelial_cells
MT-CO3.1	5.50398e-90	0.7285	0.996	0.964	1.54849e-85	High YAP1 Epithelial_cells
ZBTB20.1	5.90342e-90	0.348075	0.75	0.292	1.66087e-85	High YAP1 Epithelial_cells
MT-CO2.1	1.65906e-89	0.710094	0.995	0.955	4.66759e-85	High YAP1 Epithelial_cells
HES1.1	2.97322e-89	0.402966	0.798	0.326	8.36486e-85	High YAP1 Epithelial_cells
KRT15.1	3.56685e-89	0.374483	0.332	0.05	1.0035e-84	High YAP1 Epithelial_cells
RAB3IP.1	1.47922e-88	0.35847	0.597	0.195	4.16163e-84	High YAP1 Epithelial_cells
CLDN1.1	1.89446e-88	0.333846	0.733	0.279	5.32988e-84	High YAP1 Epithelial_cells
AQP3.1	2.01561e-88	0.470756	0.426	0.103	5.67071e-84	High YAP1 Epithelial_cells
SYT8.1	2.14523e-88	0.344072	0.443	0.107	6.0354e-84	High YAP1 Epithelial_cells
CDKN2A.1	3.95126e-88	0.378508	0.473	0.12	1.11165e-83	High YAP1 Epithelial_cells
MTDH.1	1.38679e-86	0.364905	0.916	0.457	3.90158e-82	High YAP1 Epithelial_cells
WLS.1	3.40331e-86	0.269392	0.664	0.242	9.57487e-82	High YAP1 Epithelial_cells
MACC1.1	4.55159e-86	0.270121	0.63	0.216	1.28054e-81	High YAP1 Epithelial_cells
SERBP1.1	7.38035e-86	0.434847	0.931	0.53	2.07639e-81	High YAP1 Epithelial_cells
PLAAT3.1	8.04176e-86	0.393418	0.714	0.299	2.26247e-81	High YAP1 Epithelial_cells
TXN.1	8.82003e-86	0.50468	0.914	0.523	2.48143e-81	High YAP1 Epithelial_cells
CAST.1	8.87498e-86	0.528836	0.944	0.503	2.49689e-81	High YAP1 Epithelial_cells
ITGA2.1	8.90343e-86	0.40733	0.749	0.291	2.50489e-81	High YAP1 Epithelial_cells
IQGAP1.1	9.0206e-86	0.290743	0.897	0.425	2.53785e-81	High YAP1 Epithelial_cells
CD46.1	1.04751e-85	0.337051	0.912	0.454	2.94707e-81	High YAP1 Epithelial_cells
PBX1.1	1.75018e-85	0.260127	0.722	0.284	4.92397e-81	High YAP1 Epithelial_cells
POMP.1	2.05711e-85	0.258744	0.857	0.424	5.78747e-81	High YAP1 Epithelial_cells
ID1.1	2.30819e-85	0.431648	0.696	0.26	6.49387e-81	High YAP1 Epithelial_cells
UQCRH.1	3.20974e-85	0.352338	0.92	0.503	9.03027e-81	High YAP1 Epithelial_cells
EID1.1	3.57576e-85	0.261049	0.878	0.407	1.006e-80	High YAP1 Epithelial_cells
MUC13.1	8.49976e-85	0.250212	0.521	0.149	2.39132e-80	High YAP1 Epithelial_cells
PPP1R14B.1	9.83866e-85	0.330831	0.864	0.453	2.76801e-80	High YAP1 Epithelial_cells
ACTN1.1	1.7496e-84	0.304266	0.814	0.357	4.92233e-80	High YAP1 Epithelial_cells
AKAP9.1	5.9466e-84	0.261499	0.913	0.426	1.67302e-79	High YAP1 Epithelial_cells
PRRC2C.1	7.5878e-84	0.414887	0.937	0.518	2.13475e-79	High YAP1 Epithelial_cells
ADGRF1.1	2.21528e-83	0.314483	0.363	0.074	6.23248e-79	High YAP1 Epithelial_cells
NDUFB2.1	4.49357e-83	0.25166	0.896	0.448	1.26422e-78	High YAP1 Epithelial_cells
UQCR11.1	7.10467e-83	0.330232	0.913	0.499	1.99883e-78	High YAP1 Epithelial_cells
FLNB.1	9.11172e-83	0.281912	0.858	0.37	2.56349e-78	High YAP1 Epithelial_cells
SYNE2.1	1.09728e-82	0.499328	0.929	0.472	3.08709e-78	High YAP1 Epithelial_cells
SKIL.1	1.48015e-82	0.26065	0.731	0.291	4.16425e-78	High YAP1 Epithelial_cells
TNS4.1	2.25121e-82	0.339035	0.402	0.09	6.33356e-78	High YAP1 Epithelial_cells
KRT23.1	2.79149e-82	0.285967	0.429	0.103	7.85358e-78	High YAP1 Epithelial_cells
TTC3.1	3.09544e-82	0.267218	0.841	0.396	8.70871e-78	High YAP1 Epithelial_cells
COX7A2.1	3.10793e-82	0.358359	0.9	0.483	8.74384e-78	High YAP1 Epithelial_cells
SORBS2.1	5.70793e-82	0.544199	0.649	0.243	1.60587e-77	High YAP1 Epithelial_cells
KCNQ1OT1.1	7.79194e-82	0.335949	0.744	0.307	2.19218e-77	High YAP1 Epithelial_cells
MARCKSL1.1	1.9674e-81	0.371108	0.779	0.328	5.53507e-77	High YAP1 Epithelial_cells
RIOK3.1	3.18535e-81	0.279742	0.829	0.369	8.96167e-77	High YAP1 Epithelial_cells
IFIT3.1	8.22912e-81	0.254249	0.395	0.09	2.31518e-76	High YAP1 Epithelial_cells
GTF2I.1	9.20646e-81	0.396174	0.936	0.5	2.59014e-76	High YAP1 Epithelial_cells
TPM3.1	2.14619e-80	0.498555	0.928	0.547	6.03808e-76	High YAP1 Epithelial_cells
SEC62.1	4.58619e-80	0.347992	0.916	0.478	1.29028e-75	High YAP1 Epithelial_cells
PSMA7.1	7.03751e-80	0.339103	0.893	0.491	1.97993e-75	High YAP1 Epithelial_cells
MALL.1	9.08279e-80	0.259191	0.614	0.217	2.55535e-75	High YAP1 Epithelial_cells
AHNAK2.1	1.06433e-79	0.25812	0.668	0.243	2.99438e-75	High YAP1 Epithelial_cells
MUC4.1	1.22773e-79	0.415373	0.325	0.059	3.45408e-75	High YAP1 Epithelial_cells
HIST1H1C.1	1.72649e-79	0.288164	0.709	0.293	4.85729e-75	High YAP1 Epithelial_cells
AQP5.1	2.60792e-79	0.378533	0.476	0.135	7.33711e-75	High YAP1 Epithelial_cells
TOB1.1	3.78259e-79	0.418062	0.842	0.433	1.06419e-74	High YAP1 Epithelial_cells
N4BP2L2.1	4.82958e-79	0.261259	0.872	0.397	1.35876e-74	High YAP1 Epithelial_cells
HNRNPK.1	7.72818e-79	0.307723	0.928	0.507	2.17425e-74	High YAP1 Epithelial_cells
EIF3A.1	9.72347e-79	0.312533	0.887	0.481	2.7356e-74	High YAP1 Epithelial_cells
ITGA6.1	2.54795e-78	0.404012	0.796	0.372	7.1684e-74	High YAP1 Epithelial_cells
RBM39.1	3.31861e-78	0.309493	0.922	0.459	9.33658e-74	High YAP1 Epithelial_cells
ARPC1B.1	3.70523e-78	0.252776	0.86	0.407	1.04243e-73	High YAP1 Epithelial_cells
GOLGB1.1	1.4446e-77	0.352414	0.915	0.482	4.06423e-73	High YAP1 Epithelial_cells
UQCRQ.1	5.01529e-77	0.328564	0.924	0.523	1.411e-72	High YAP1 Epithelial_cells
CAMK2N1.1	5.6572e-77	0.6049	0.755	0.339	1.5916e-72	High YAP1 Epithelial_cells
NSA2.1	1.14985e-76	0.251922	0.813	0.374	3.23498e-72	High YAP1 Epithelial_cells
LAMA3.1	2.18797e-76	0.252547	0.694	0.259	6.15562e-72	High YAP1 Epithelial_cells
TSPAN1.1	5.32009e-76	0.282424	0.675	0.252	1.49675e-71	High YAP1 Epithelial_cells
PTTG1IP.1	1.45862e-75	0.294554	0.894	0.445	4.10367e-71	High YAP1 Epithelial_cells
TXNIP.1	3.30982e-75	0.869506	0.924	0.555	9.31184e-71	High YAP1 Epithelial_cells
GLUL.1	4.52797e-75	0.300357	0.829	0.404	1.2739e-70	High YAP1 Epithelial_cells
APP.1	8.43806e-75	0.390281	0.897	0.453	2.37396e-70	High YAP1 Epithelial_cells
CDC42.1	9.68939e-75	0.274167	0.907	0.481	2.72601e-70	High YAP1 Epithelial_cells
GUK1.1	1.67624e-74	0.398935	0.918	0.543	4.71593e-70	High YAP1 Epithelial_cells
COL17A1.1	1.49891e-73	0.446642	0.454	0.132	4.21703e-69	High YAP1 Epithelial_cells
MT-CYB.1	1.94353e-73	0.627813	0.996	0.946	5.46793e-69	High YAP1 Epithelial_cells
LMO7.1	2.02906e-73	0.361321	0.872	0.396	5.70857e-69	High YAP1 Epithelial_cells
ALDH3A2.1	3.23202e-73	0.259454	0.525	0.175	9.09296e-69	High YAP1 Epithelial_cells
APLP2.1	1.29512e-72	0.412815	0.942	0.498	3.64369e-68	High YAP1 Epithelial_cells
KLK10.1	9.67048e-72	0.351634	0.503	0.157	2.72069e-67	High YAP1 Epithelial_cells
MMP7.1	1.32242e-71	0.925328	0.894	0.491	3.72051e-67	High YAP1 Epithelial_cells
TGM2.1	2.35041e-71	0.324196	0.572	0.2	6.61264e-67	High YAP1 Epithelial_cells
EIF3E.1	3.17452e-71	0.269345	0.883	0.491	8.93121e-67	High YAP1 Epithelial_cells
HINT1.1	4.39615e-71	0.389275	0.942	0.579	1.23681e-66	High YAP1 Epithelial_cells
S100A16.1	5.1963e-71	0.392894	0.845	0.4	1.46193e-66	High YAP1 Epithelial_cells
ARL6IP1.1	1.38236e-69	0.266864	0.909	0.454	3.88912e-65	High YAP1 Epithelial_cells
LINC00342.1	1.84703e-69	0.362904	0.531	0.182	5.19643e-65	High YAP1 Epithelial_cells
ELOB.1	2.16215e-69	0.366706	0.935	0.58	6.08299e-65	High YAP1 Epithelial_cells
PERP.1	2.46194e-69	0.447705	0.918	0.497	6.92642e-65	High YAP1 Epithelial_cells
PLAT.1	6.47321e-69	0.437635	0.582	0.215	1.82117e-64	High YAP1 Epithelial_cells
OST4.1	8.27176e-68	0.250033	0.914	0.524	2.32718e-63	High YAP1 Epithelial_cells
DSP.1	8.43917e-68	0.511268	0.937	0.55	2.37428e-63	High YAP1 Epithelial_cells
YBX1.1	1.08804e-67	0.349785	0.947	0.601	3.0611e-63	High YAP1 Epithelial_cells
S100A2.1	1.53531e-67	0.310764	0.429	0.122	4.31944e-63	High YAP1 Epithelial_cells
ARPC2.1	1.92864e-67	0.258429	0.912	0.505	5.42605e-63	High YAP1 Epithelial_cells
EPCAM.1	2.27954e-67	0.472031	0.96	0.586	6.41326e-63	High YAP1 Epithelial_cells
NDUFA13.1	2.33199e-67	0.312064	0.939	0.552	6.56081e-63	High YAP1 Epithelial_cells
MUC16.1	3.7139e-67	0.283705	0.36	0.09	1.04487e-62	High YAP1 Epithelial_cells
ITGB6.1	3.73037e-67	0.287638	0.735	0.312	1.0495e-62	High YAP1 Epithelial_cells
HNRNPU.1	6.47227e-67	0.290194	0.938	0.52	1.82091e-62	High YAP1 Epithelial_cells
SPINT2.1	1.0497e-66	0.451143	0.96	0.616	2.95322e-62	High YAP1 Epithelial_cells
MT-ATP6.1	2.84404e-66	0.550866	0.997	0.981	8.00142e-62	High YAP1 Epithelial_cells
ATP1A1.1	3.85863e-66	0.571694	0.96	0.575	1.08559e-61	High YAP1 Epithelial_cells
COX6B1.1	4.73404e-66	0.29202	0.927	0.568	1.33187e-61	High YAP1 Epithelial_cells
ATP5MC2.1	4.81137e-66	0.278605	0.924	0.549	1.35363e-61	High YAP1 Epithelial_cells
PSCA.1	9.72054e-66	0.59459	0.361	0.094	2.73478e-61	High YAP1 Epithelial_cells
SON.1	1.0379e-65	0.285664	0.933	0.485	2.92002e-61	High YAP1 Epithelial_cells
BTF3.1	1.88468e-64	0.307276	0.922	0.565	5.30237e-60	High YAP1 Epithelial_cells
SPTBN1.1	2.01381e-64	0.339088	0.929	0.481	5.66564e-60	High YAP1 Epithelial_cells
TESC.1	5.75868e-64	0.272857	0.735	0.355	1.62015e-59	High YAP1 Epithelial_cells
GLIS3.1	1.62024e-63	0.3143	0.404	0.118	4.55839e-59	High YAP1 Epithelial_cells
HMGB1.1	2.82851e-63	0.446782	0.968	0.649	7.95773e-59	High YAP1 Epithelial_cells
CHCHD2.1	4.02227e-63	0.254423	0.94	0.574	1.13163e-58	High YAP1 Epithelial_cells
SLC12A2.1	1.34052e-62	0.345199	0.712	0.315	3.77141e-58	High YAP1 Epithelial_cells
CLDN10.1	7.87495e-62	0.523872	0.726	0.372	2.21554e-57	High YAP1 Epithelial_cells
COX4I1.1	1.52667e-61	0.370037	0.932	0.604	4.29512e-57	High YAP1 Epithelial_cells
EDN1.1	2.66883e-61	0.362461	0.492	0.175	7.50848e-57	High YAP1 Epithelial_cells
NCL.1	9.22642e-61	0.26115	0.94	0.552	2.59576e-56	High YAP1 Epithelial_cells
HSPG2.1	1.01686e-60	-0.252494	0.696	0.266	2.86084e-56	High YAP1 Epithelial_cells
MT-ND3.1	1.05573e-60	0.528246	0.993	0.962	2.9702e-56	High YAP1 Epithelial_cells
DST.1	2.58731e-60	0.296279	0.917	0.467	7.27913e-56	High YAP1 Epithelial_cells
MYL12B.1	3.52226e-60	0.330806	0.95	0.549	9.90952e-56	High YAP1 Epithelial_cells
PTMA.1	2.23472e-59	0.558309	0.995	0.904	6.28717e-55	High YAP1 Epithelial_cells
PPP1R1B.1	3.99266e-59	0.361172	0.457	0.159	1.1233e-54	High YAP1 Epithelial_cells
CALM2.1	4.83205e-59	0.380132	0.96	0.595	1.35945e-54	High YAP1 Epithelial_cells
MYL12A.1	1.43774e-58	0.280482	0.94	0.528	4.04493e-54	High YAP1 Epithelial_cells
ITGB1.1	2.27664e-58	0.351299	0.942	0.565	6.40511e-54	High YAP1 Epithelial_cells
ADH1C.1	3.81632e-58	0.318871	0.259	0.052	1.07368e-53	High YAP1 Epithelial_cells
SERPINB1.1	1.59657e-57	0.315166	0.836	0.471	4.4918e-53	High YAP1 Epithelial_cells
GMNN.1	1.8199e-57	0.461658	0.517	0.201	5.1201e-53	High YAP1 Epithelial_cells
NME2.1	1.37458e-56	0.457614	0.947	0.69	3.86726e-52	High YAP1 Epithelial_cells
AKR1C1.1	2.04566e-56	0.562274	0.341	0.1	5.75525e-52	High YAP1 Epithelial_cells
ELF3.1	2.53828e-56	0.347743	0.919	0.539	7.14119e-52	High YAP1 Epithelial_cells
KRT16.1	2.67582e-56	0.255884	0.504	0.186	7.52814e-52	High YAP1 Epithelial_cells
KLK7.1	3.18384e-56	0.278981	0.514	0.192	8.95743e-52	High YAP1 Epithelial_cells
FSTL1.1	8.03045e-56	-0.29515	0.437	0.138	2.25929e-51	High YAP1 Epithelial_cells
PTGS2.1	1.47164e-55	0.272742	0.424	0.141	4.14031e-51	High YAP1 Epithelial_cells
CEACAM7.1	2.97514e-55	0.408246	0.262	0.056	8.37026e-51	High YAP1 Epithelial_cells
RPS20.1	5.81958e-55	0.413624	0.966	0.694	1.63728e-50	High YAP1 Epithelial_cells
GDF15.1	4.13663e-54	0.565515	0.368	0.118	1.1638e-49	High YAP1 Epithelial_cells
DSTN.1	1.11443e-53	0.390997	0.93	0.582	3.13534e-49	High YAP1 Epithelial_cells
TPM4.1	1.37017e-53	0.270832	0.923	0.497	3.85484e-49	High YAP1 Epithelial_cells
HSPA5.1	2.88597e-53	0.256554	0.899	0.532	8.11939e-49	High YAP1 Epithelial_cells
DMBT1.1	1.60655e-52	0.519749	0.295	0.077	4.51985e-48	High YAP1 Epithelial_cells
C19orf33.1	2.58326e-52	0.513148	0.766	0.417	7.26774e-48	High YAP1 Epithelial_cells
PMEPA1.1	3.36255e-52	0.517713	0.926	0.549	9.46019e-48	High YAP1 Epithelial_cells
IFITM3.1	9.39496e-52	0.283708	0.922	0.528	2.64318e-47	High YAP1 Epithelial_cells
WFDC2.1	1.03162e-51	0.279448	0.842	0.428	2.90235e-47	High YAP1 Epithelial_cells
CRABP2.1	1.85768e-51	0.384214	0.417	0.147	5.22641e-47	High YAP1 Epithelial_cells
SLC16A7.1	2.13758e-51	0.252493	0.415	0.148	6.01388e-47	High YAP1 Epithelial_cells
LY6E.1	4.61003e-51	0.318167	0.86	0.47	1.29699e-46	High YAP1 Epithelial_cells
ANXA4.1	1.01951e-49	0.462098	0.948	0.553	2.86828e-45	High YAP1 Epithelial_cells
SERPINA5.1	3.19292e-49	0.304094	0.45	0.169	8.98296e-45	High YAP1 Epithelial_cells
TPM1.1	1.72418e-48	0.415326	0.95	0.562	4.8508e-44	High YAP1 Epithelial_cells
CD68.1	3.01951e-48	-0.321183	0.467	0.163	8.4951e-44	High YAP1 Epithelial_cells
S100A10.1	3.55916e-48	0.528092	0.979	0.72	1.00133e-43	High YAP1 Epithelial_cells
AQP1.1	4.04962e-48	0.337971	0.466	0.18	1.13932e-43	High YAP1 Epithelial_cells
ACTN4.1	7.5697e-48	0.258263	0.939	0.556	2.12966e-43	High YAP1 Epithelial_cells
MIA.1	1.34756e-47	0.371482	0.541	0.231	3.79123e-43	High YAP1 Epithelial_cells
MT-ND4.1	2.39479e-47	0.46574	0.997	0.945	6.73751e-43	High YAP1 Epithelial_cells
COX7C.1	2.94418e-47	0.322641	0.957	0.63	8.28316e-43	High YAP1 Epithelial_cells
DDIT4.1	4.30735e-47	0.273495	0.689	0.349	1.21183e-42	High YAP1 Epithelial_cells
SCD5.1	5.01373e-47	0.252813	0.336	0.108	1.41056e-42	High YAP1 Epithelial_cells
YWHAZ.1	5.88615e-47	0.290538	0.942	0.595	1.65601e-42	High YAP1 Epithelial_cells
LGALS3.1	8.00986e-47	0.496971	0.868	0.549	2.25349e-42	High YAP1 Epithelial_cells
PPIA.1	1.81925e-46	0.278985	0.972	0.717	5.11828e-42	High YAP1 Epithelial_cells
SRP14.1	2.36544e-46	0.25658	0.965	0.626	6.65494e-42	High YAP1 Epithelial_cells
MT-ND2.1	7.81136e-46	0.388576	0.991	0.919	2.19765e-41	High YAP1 Epithelial_cells
IL1RN.1	2.36335e-45	-0.262263	0.46	0.168	6.64906e-41	High YAP1 Epithelial_cells
GSTP1.1	4.58097e-45	0.343217	0.968	0.71	1.28881e-40	High YAP1 Epithelial_cells
MT-ND1.1	1.45896e-43	0.425874	0.995	0.924	4.10463e-39	High YAP1 Epithelial_cells
TAGLN2.1	1.61477e-43	0.263177	0.926	0.572	4.54298e-39	High YAP1 Epithelial_cells
GPRC5A.1	1.11194e-42	0.293655	0.732	0.372	3.12833e-38	High YAP1 Epithelial_cells
DCDC2.1	3.29617e-42	0.504918	0.384	0.148	9.27343e-38	High YAP1 Epithelial_cells
KRT19.1	7.68081e-41	0.517145	0.924	0.652	2.16092e-36	High YAP1 Epithelial_cells
S100P.1	1.72025e-40	0.361823	0.688	0.348	4.83974e-36	High YAP1 Epithelial_cells
SAA1.1	2.99832e-40	0.31716	0.307	0.1	8.43546e-36	High YAP1 Epithelial_cells
HSP90AB1.1	3.94902e-40	0.351975	0.973	0.718	1.11102e-35	High YAP1 Epithelial_cells
H3F3A.1	6.87509e-40	0.363115	0.99	0.819	1.93424e-35	High YAP1 Epithelial_cells
IGFBP4.1	3.98382e-39	-0.493998	0.589	0.249	1.12081e-34	High YAP1 Epithelial_cells
ATF3.1	1.1605e-38	0.395158	0.587	0.299	3.26495e-34	High YAP1 Epithelial_cells
TM4SF1.1	1.48483e-38	0.279171	0.933	0.548	4.17742e-34	High YAP1 Epithelial_cells
SOD3.1	1.53039e-38	0.274223	0.43	0.18	4.3056e-34	High YAP1 Epithelial_cells
GADD45B.1	1.66575e-38	-0.251146	0.576	0.266	4.68642e-34	High YAP1 Epithelial_cells
ATP1B1.1	2.93007e-38	0.370213	0.951	0.574	8.24346e-34	High YAP1 Epithelial_cells
IFI30.1	3.00904e-38	-0.388983	0.493	0.205	8.46564e-34	High YAP1 Epithelial_cells
C1R.1	1.13338e-37	-0.268427	0.372	0.138	3.18865e-33	High YAP1 Epithelial_cells
RPS8.1	1.66343e-37	0.35773	0.982	0.815	4.67989e-33	High YAP1 Epithelial_cells
PROX1.1	1.97336e-37	0.319229	0.327	0.123	5.55184e-33	High YAP1 Epithelial_cells
RPS19.1	2.92954e-37	0.378516	0.996	0.923	8.24197e-33	High YAP1 Epithelial_cells
HSP90B1.1	1.32546e-36	0.255043	0.943	0.613	3.72905e-32	High YAP1 Epithelial_cells
FXYD3.1	1.41138e-36	0.466956	0.769	0.497	3.97078e-32	High YAP1 Epithelial_cells
CD55.1	4.63577e-36	0.3674	0.811	0.453	1.30423e-31	High YAP1 Epithelial_cells
FILIP1L.1	1.31576e-35	0.273966	0.396	0.165	3.70175e-31	High YAP1 Epithelial_cells
HLA-DPB1.1	1.84356e-35	-0.266334	0.615	0.291	5.18667e-31	High YAP1 Epithelial_cells
ATP5F1E.1	2.16438e-35	0.277554	0.981	0.763	6.08928e-31	High YAP1 Epithelial_cells
IGFBP3.1	2.88863e-35	-0.264885	0.403	0.159	8.12687e-31	High YAP1 Epithelial_cells
HNRNPH1.1	3.43632e-35	-0.263663	0.886	0.473	9.66774e-31	High YAP1 Epithelial_cells
CEACAM5.1	4.23076e-35	0.651297	0.295	0.107	1.19028e-30	High YAP1 Epithelial_cells
LCN2.1	5.88757e-35	0.428482	0.734	0.404	1.65641e-30	High YAP1 Epithelial_cells
CTSB.1	9.21323e-35	-0.261491	0.847	0.469	2.59205e-30	High YAP1 Epithelial_cells
SLC4A4.1	1.06136e-34	0.740333	0.48	0.235	2.98602e-30	High YAP1 Epithelial_cells
HSP90AA1.1	2.12565e-34	0.38833	0.979	0.762	5.98031e-30	High YAP1 Epithelial_cells
CFTR.1	2.90583e-34	0.728002	0.477	0.24	8.17527e-30	High YAP1 Epithelial_cells
HLA-DQB1.1	3.09097e-34	-0.294605	0.488	0.209	8.69613e-30	High YAP1 Epithelial_cells
ITM2B.1	4.79636e-34	0.284003	0.97	0.73	1.34941e-29	High YAP1 Epithelial_cells
CXCL17.1	1.15184e-33	0.461169	0.515	0.272	3.24058e-29	High YAP1 Epithelial_cells
MYL9.1	1.22443e-33	-0.396046	0.385	0.15	3.44481e-29	High YAP1 Epithelial_cells
CALD1.1	2.05506e-33	-0.253062	0.581	0.274	5.78171e-29	High YAP1 Epithelial_cells
S100A11.1	2.79698e-33	0.371786	0.977	0.779	7.86903e-29	High YAP1 Epithelial_cells
RPS16.1	3.75526e-33	0.31081	0.985	0.84	1.05651e-28	High YAP1 Epithelial_cells
PLIN2.1	7.04962e-33	-0.288728	0.349	0.135	1.98334e-28	High YAP1 Epithelial_cells
APOL1.1	7.89397e-33	-0.307139	0.652	0.305	2.22089e-28	High YAP1 Epithelial_cells
RPL7.1	1.13344e-32	0.264694	0.973	0.741	3.18882e-28	High YAP1 Epithelial_cells
PKHD1.1	6.06881e-32	0.289667	0.269	0.097	1.7074e-27	High YAP1 Epithelial_cells
S100A6.1	6.75797e-30	0.511436	0.977	0.795	1.90129e-25	High YAP1 Epithelial_cells
AL627171.2.1	2.36088e-29	-0.390748	0.624	0.32	6.6421e-25	High YAP1 Epithelial_cells
ID3.1	3.26431e-29	-0.288774	0.331	0.133	9.18382e-25	High YAP1 Epithelial_cells
HEG1.1	2.14117e-28	0.25943	0.297	0.122	6.02395e-24	High YAP1 Epithelial_cells
C1S.1	2.5125e-28	-0.368816	0.344	0.139	7.06868e-24	High YAP1 Epithelial_cells
COL12A1.1	2.5939e-28	-0.400371	0.305	0.116	7.29769e-24	High YAP1 Epithelial_cells
TCN1.1	2.77787e-27	0.430312	0.292	0.12	7.81525e-23	High YAP1 Epithelial_cells
MUC6.1	3.82104e-27	0.401619	0.363	0.173	1.07501e-22	High YAP1 Epithelial_cells
SGK1.1	1.76782e-26	-0.334865	0.549	0.277	4.97359e-22	High YAP1 Epithelial_cells
C1orf56.1	1.77012e-26	-0.292689	0.285	0.111	4.98007e-22	High YAP1 Epithelial_cells
SLC3A1.1	3.47126e-26	0.384829	0.379	0.185	9.76605e-22	High YAP1 Epithelial_cells
KRT17.1	1.55686e-25	0.463376	0.687	0.411	4.38008e-21	High YAP1 Epithelial_cells
S100A9.1	3.96368e-24	0.285932	0.396	0.191	1.11514e-19	High YAP1 Epithelial_cells
GAPDH.1	5.16124e-24	0.2874	0.979	0.776	1.45206e-19	High YAP1 Epithelial_cells
MTRNR2L12.1	6.81184e-24	-0.871893	0.481	0.242	1.91644e-19	High YAP1 Epithelial_cells
LY6D.1	1.15692e-23	0.279217	0.309	0.136	3.25489e-19	High YAP1 Epithelial_cells
CELA2A.1	5.26825e-23	-2.94904	0.123	0.26	1.48217e-18	High YAP1 Epithelial_cells
CPA2.1	1.0745e-22	-2.51609	0.126	0.261	3.02299e-18	High YAP1 Epithelial_cells
RBP1.1	3.64119e-22	0.255842	0.575	0.35	1.02441e-17	High YAP1 Epithelial_cells
FXYD2.1	3.0108e-21	0.581786	0.331	0.169	8.47059e-17	High YAP1 Epithelial_cells
DEFB1.1	5.27645e-21	0.355346	0.459	0.265	1.48448e-16	High YAP1 Epithelial_cells
TUBA1A.1	1.93185e-20	-0.278556	0.449	0.229	5.43506e-16	High YAP1 Epithelial_cells
CTRB2.1	5.14847e-20	-2.2863	0.155	0.279	1.44847e-15	High YAP1 Epithelial_cells
PABPC4.1	5.61939e-20	-0.25851	0.765	0.422	1.58096e-15	High YAP1 Epithelial_cells
CELA3A.1	7.4809e-20	-3.07183	0.179	0.302	2.10468e-15	High YAP1 Epithelial_cells
BTG2.1	7.88408e-20	-0.371494	0.597	0.335	2.21811e-15	High YAP1 Epithelial_cells
ONECUT1.1	9.41707e-20	0.265234	0.331	0.176	2.6494e-15	High YAP1 Epithelial_cells
ITGB2.1	1.10595e-19	-0.323185	0.292	0.13	3.11149e-15	High YAP1 Epithelial_cells
PNLIP.1	6.67832e-19	-3.15349	0.191	0.309	1.87888e-14	High YAP1 Epithelial_cells
CPB1.1	1.00618e-18	-3.13182	0.18	0.296	2.83078e-14	High YAP1 Epithelial_cells
NR4A2.1	1.93466e-18	-0.352751	0.394	0.199	5.44296e-14	High YAP1 Epithelial_cells
IFI27.1	2.46852e-18	0.27914	0.791	0.598	6.94494e-14	High YAP1 Epithelial_cells
CPA1.1	2.72361e-18	-3.10637	0.186	0.301	7.6626e-14	High YAP1 Epithelial_cells
AMY2A.1	2.96756e-18	-3.3667	0.159	0.273	8.34893e-14	High YAP1 Epithelial_cells
CEL.1	3.45094e-18	-2.84028	0.171	0.285	9.70887e-14	High YAP1 Epithelial_cells
PLXDC2.1	4.27253e-18	-0.307661	0.256	0.113	1.20203e-13	High YAP1 Epithelial_cells
COL6A1.1	9.68407e-18	-0.452144	0.575	0.323	2.72452e-13	High YAP1 Epithelial_cells
SYCN.1	9.97908e-18	-2.99889	0.178	0.291	2.80752e-13	High YAP1 Epithelial_cells
PLA2G1B.1	1.34675e-17	-2.76741	0.176	0.289	3.78896e-13	High YAP1 Epithelial_cells
CEACAM6.1	1.48348e-17	0.281289	0.697	0.45	4.17362e-13	High YAP1 Epithelial_cells
CTRB1.1	4.64818e-17	-3.03316	0.198	0.307	1.30772e-12	High YAP1 Epithelial_cells
CLPS.1	5.35554e-17	-2.96719	0.204	0.315	1.50673e-12	High YAP1 Epithelial_cells
ICAM1.1	1.07605e-16	-0.282387	0.253	0.115	3.02735e-12	High YAP1 Epithelial_cells
MKNK1.1	1.47878e-16	-0.314206	0.332	0.169	4.16041e-12	High YAP1 Epithelial_cells
PSAP.1	3.37306e-16	-0.290914	0.94	0.634	9.48978e-12	High YAP1 Epithelial_cells
SEL1L.1	4.48547e-16	-0.328377	0.708	0.391	1.26194e-11	High YAP1 Epithelial_cells
TNFAIP3.1	6.44555e-16	-0.430215	0.437	0.233	1.81339e-11	High YAP1 Epithelial_cells
IGHA1.1	6.53013e-16	-1.1817	0.351	0.171	1.83719e-11	High YAP1 Epithelial_cells
CXCL1.1	7.40777e-16	-0.265254	0.3	0.15	2.0841e-11	High YAP1 Epithelial_cells
CTRC.1	1.48002e-15	-2.95692	0.192	0.292	4.16388e-11	High YAP1 Epithelial_cells
CELA3B.1	2.78205e-15	-3.00798	0.188	0.286	7.82701e-11	High YAP1 Epithelial_cells
MMP2.1	5.75139e-15	-0.426627	0.259	0.125	1.6181e-10	High YAP1 Epithelial_cells
GOLGA8B.1	2.38283e-14	-0.801797	0.354	0.192	6.70385e-10	High YAP1 Epithelial_cells
RGCC.1	3.00589e-14	-0.396513	0.29	0.146	8.45678e-10	High YAP1 Epithelial_cells
PRSS1.1	7.12678e-14	-3.39247	0.248	0.333	2.00505e-09	High YAP1 Epithelial_cells
MUC1.1	3.07552e-13	0.306509	0.814	0.703	8.65268e-09	High YAP1 Epithelial_cells
GP2.1	5.46615e-13	-2.94163	0.274	0.348	1.53785e-08	High YAP1 Epithelial_cells
NFKBIA.1	8.54763e-13	-0.404908	0.79	0.488	2.40479e-08	High YAP1 Epithelial_cells
SOD2.1	1.80258e-12	-0.305407	0.798	0.504	5.07137e-08	High YAP1 Epithelial_cells
CLU.1	1.86018e-12	0.586521	0.606	0.458	5.23342e-08	High YAP1 Epithelial_cells
GPNMB.1	4.45378e-12	-0.444127	0.254	0.131	1.25303e-07	High YAP1 Epithelial_cells
ANPEP.1	1.99072e-11	-0.502829	0.162	0.251	5.6007e-07	High YAP1 Epithelial_cells
NUCB2.1	2.2779e-11	-0.326839	0.632	0.356	6.40865e-07	High YAP1 Epithelial_cells
APOC1.1	4.34134e-11	-0.574236	0.386	0.217	1.22139e-06	High YAP1 Epithelial_cells
PRSS2.1	1.33543e-10	-3.16692	0.344	0.386	3.7571e-06	High YAP1 Epithelial_cells
TIMP3.1	2.13045e-10	-0.601763	0.289	0.16	5.9938e-06	High YAP1 Epithelial_cells
IGHG4.1	7.58184e-10	-0.818833	0.33	0.182	2.13307e-05	High YAP1 Epithelial_cells
CXCL2.1	8.25031e-10	-0.367419	0.34	0.2	2.32114e-05	High YAP1 Epithelial_cells
CXCL3.1	1.01539e-09	-0.421478	0.394	0.236	2.85669e-05	High YAP1 Epithelial_cells
XBP1.1	1.05908e-09	-0.258398	0.732	0.454	2.97961e-05	High YAP1 Epithelial_cells
VIM.1	1.41939e-09	-0.947396	0.654	0.605	3.9933e-05	High YAP1 Epithelial_cells
SPINK1.1	7.09481e-09	-1.58476	0.522	0.491	0.000199605	High YAP1 Epithelial_cells
COL6A2.1	1.01045e-08	-0.657463	0.282	0.161	0.00028428	High YAP1 Epithelial_cells
MT1X.1	4.07146e-08	-0.583438	0.691	0.416	0.00114546	High YAP1 Epithelial_cells
NUPR1.1	6.91453e-08	-1.03828	0.311	0.342	0.00194533	High YAP1 Epithelial_cells
BACE1.1	1.85513e-07	-0.271815	0.356	0.221	0.00521921	High YAP1 Epithelial_cells
LGALS1.1	4.07955e-07	-0.695131	0.507	0.319	0.0114774	High YAP1 Epithelial_cells
IGKC.1	7.08045e-07	-1.49583	0.605	0.363	0.0199201	High YAP1 Epithelial_cells
HLA-DRA.1	3.71324e-06	-0.435186	0.724	0.496	0.104468	High YAP1 Epithelial_cells
G0S2.1	1.19492e-05	-0.52669	0.251	0.16	0.336178	High YAP1 Epithelial_cells
TAGLN.1	1.58021e-05	-0.523158	0.307	0.203	0.444577	High YAP1 Epithelial_cells
MT1G.1	5.55538e-05	-1.37372	0.263	0.284	1	High YAP1 Epithelial_cells
LUM.1	0.000518912	-1.04606	0.37	0.244	1	High YAP1 Epithelial_cells
IGLC2.1	0.00090115	-1.4937	0.455	0.291	1	High YAP1 Epithelial_cells
AL121761.1.1	0.000954428	-0.426992	0.309	0.22	1	High YAP1 Epithelial_cells
FTL.1	0.00651421	-0.311544	0.985	0.952	1	High YAP1 Epithelial_cells
PRSS3.1	0.00908749	-2.1065	0.516	0.337	1	High YAP1 Epithelial_cells
